# Supplementary material for: Fe3O4/PANI/CuI as a sustainable heterogeneous nanocatalyst for A3 coupling
Source: Royal Society of Chemistry journal article supplement (doi:10.1039/d4na00448e), 2024-01-01
Supplement: d4na00448e1.pdf [file d4na00448e1.pdf]

## Supporting Information

### **Fe<sub>3</sub>O<sub>4</sub>/PANI/CuI as sustainable heterogenous nanocatalyst for A<sup>3</sup> coupling**

Nisha<sup>a</sup>, Sahil Kohli<sup>a,f</sup>, Snigdha Singh,<sup>a</sup> Neera Sharma<sup>b\*</sup>, Ramesh Chandra<sup>a,c,d\*</sup>

---

<sup>a</sup>Drug Discovery & Development Laboratory, Department of Chemistry, University of Delhi, Delhi-110007, India.

<sup>b</sup>Department of Chemistry, Hindu College, University of Delhi, Delhi-110019, India.

<sup>c</sup>Dr. B. R. Ambedkar Centre for Biomedical Research (ACBR), University of Delhi, Delhi-110007, India.

<sup>d</sup>Institute of Nanomedical Science (INMS), University of Delhi, Delhi-110007, India.

<sup>e</sup>Maharaja Surajmal Brij University, Bharatpur 321201, Rajasthan, India.

<sup>f</sup>Department of chemistry, school of basic sciences, Galgotias University, Greater Noida-203201, Uttar Pradesh India.

---

Electronic supplementary information (ESI) includes FESEM, XRD, FTIR and TEM of recycled Fe<sub>3</sub>O<sub>4</sub>/PANI/CuI nanocomposite; green chemistry matric calculation, <sup>1</sup>H NMR and <sup>13</sup>C NMR of compounds.

Total no. of Pages: 26, Total no. of Figures: 24

#### Table of contents

| Serial number | Content                                                                                    | Page number |
|---------------|--------------------------------------------------------------------------------------------|-------------|
| 1.            | General Remarks                                                                            | 2           |
| 2.            | FESEM, XRD, TEM and FTIR of recycled Fe <sub>3</sub> O <sub>4</sub> /PANI/CuI nanocatalyst | 2-4         |
| 4.            | Calculation of green chemistry matrices                                                    | 4-5         |
| 5.            | Spectral data of compounds                                                                 | 6-7         |
| 6.            | <sup>1</sup> H and <sup>13</sup> C spectra of compounds                                    | 8-26        |

## 1. General Remark

Chemicals and solvents were purchased from sigma aldrich, alfa-aesar and Merck India pvt.  $^1\text{H}$  and  $^{13}\text{C}$  spectra were recorded on a Jeol Spectrospin spectrometer at 400 MHz and 100 MHz respectively by keeping TMS as internal standard. Chemical shift values were recorded in terms of  $\delta$  and coupling constant in hertz (Hz). The X-ray diffractometer (Model No. D8 DISCOVER) at  $2\theta$  range of  $5\text{--}90^\circ$  with  $\text{Cu K}\alpha$  radiation. FTIR spectra were obtained on IR affinity 1S- Fourier Transform Infrared spectrophotometer. Scanning electron microscopy was performed on JEOL JSM 6610 at USIC, University of Delhi. Transmission electron microscopy was obtained on a TECNAI 200 HR-TEM. The elemental composition and electronic structure analysis were obtained from X-ray photoelectron spectra (XPS) of Thermofisher- company model-K@.

## 2. FESEM, XRD, TEM and FTIR (Figure S1 S2 S3 and S4) of Recycled Nanocatalyst

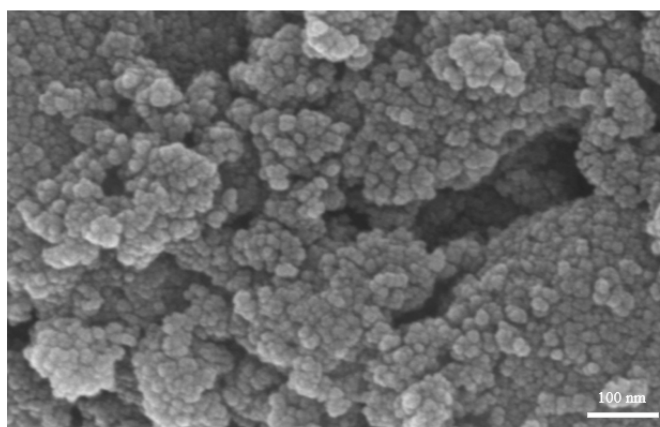

Figure S1: FESEM image of recycled nanocatalyst

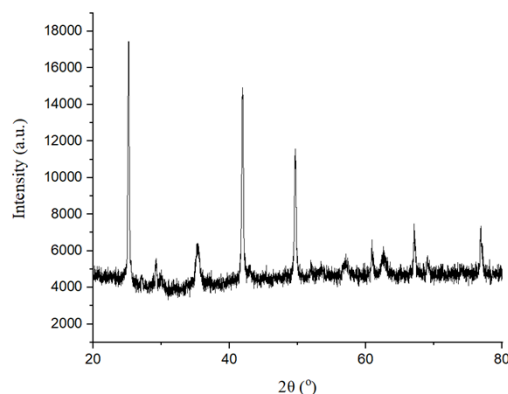

Figure S2: XRD of recycled nanocatalyst

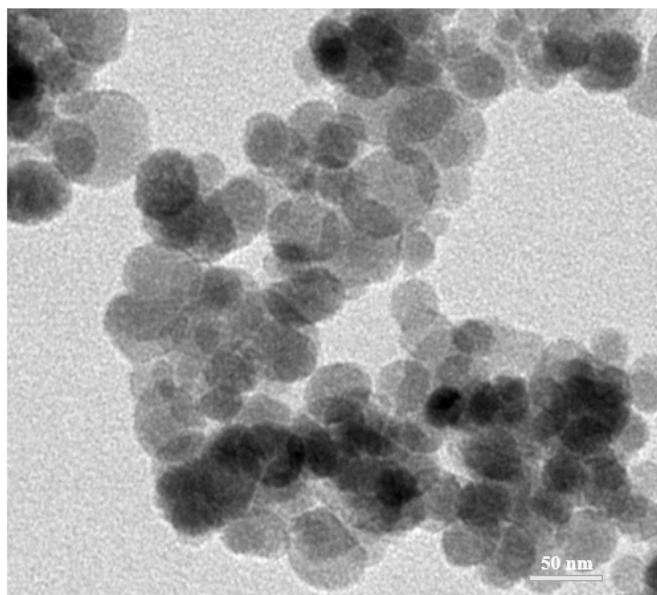

Figure S3: TEM image of recycled nanocatalyst

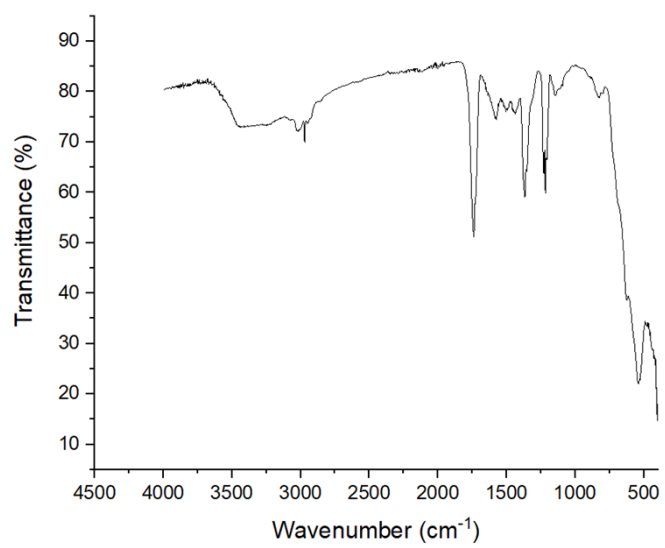

Figure S4: FTIR of recycled nanocatalyst

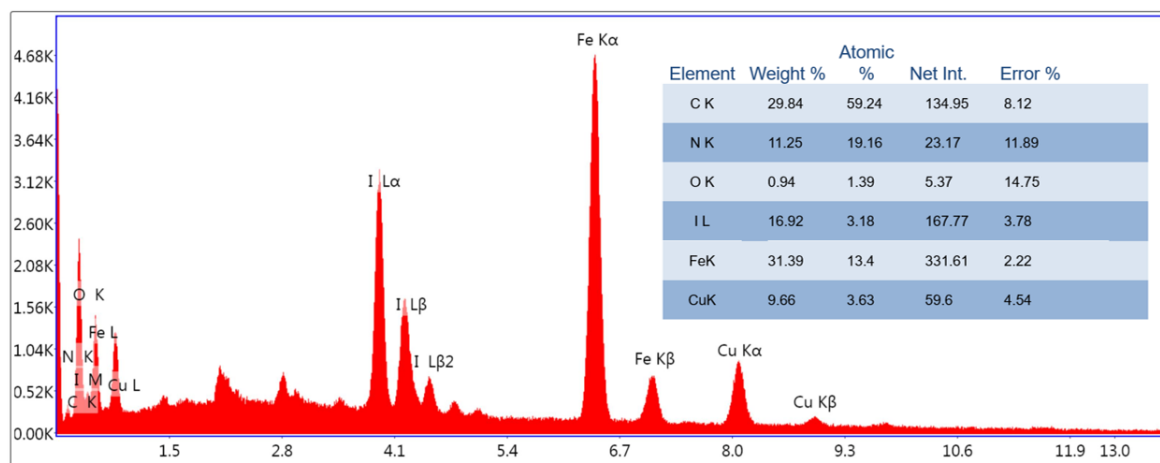

Figure S5: EDAX of recycled nanocatalyst

### 3. Calculation of Green Chemistry Matrices for 4b

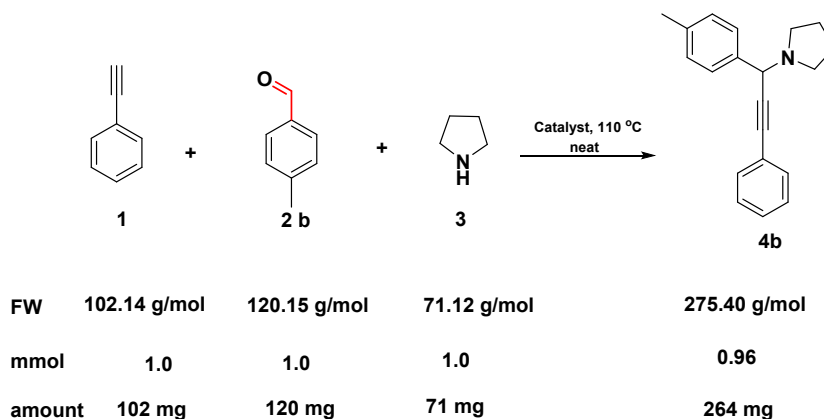

#### E-factor:

The ideal value of E-factor is zero.

E-factor = [total mass of raw materials-total mass of product]/mass of product.

E-factor of 4b = [(102+120+71) - 264]/264

$$= 0.10$$

#### Process Mass Intensity (PMI):

PMI =  $\sum$  (mass of stoichiometric reactants)/ [mass of product]

$$= (102+120+71)/ 264$$

$$= 1.10$$

#### Reaction Mass Efficiency (RME):

$$\begin{aligned} \text{RME} &= [\text{mass of product} / \Sigma (\text{mass of stoichiometric reactants})] \times 100 \\ &= [264 / (102+120+71)] \times 100 \\ &= 90 \% \end{aligned}$$

#### Carbon Efficiency (CE):

CE denotes the percentage of carbon in the reactants that remains in the product.

$$\begin{aligned} \text{CE} &= [\text{Amount of carbon in product} / \text{Total carbon present in reactants}] \times 100 \\ &= [\text{no. of moles of product} \times \text{no. of carbons in product} / (\text{no. of moles of 1} \times \text{no. of carbons in 1} \\ &\quad + \text{no. of moles of 2} \times \text{no. of carbons in 2} + \text{no. of moles of 3} \times \text{no. of carbon in 3})] \times 100 \\ &= [(0.96 \times 20) / (1.0 \times 8 + 1.0 \times 8 + 1.0 \times 4)] \times 100 \\ &= [19.2 / (8 + 8 + 4)] \times 100 \\ &= 96 \% \end{aligned}$$

## 4. Spectral data of compounds

### 1-(1-(4-methoxyphenyl)-3-phenylprop-2-yn-1-yl)pyrrolidine<sup>4a</sup>

Solid; Yield: 85%; <sup>1</sup>H NMR (CDCl<sub>3</sub>, 400 MHz): δ 7.52-7.50 (d, *J* = 8.7 Hz, 2H), 7.48 (s, 1H), 7.31-7.29 (m, 4H), 6.89-6.87 (d, *J* = 8.7 Hz, 2H), 4.82 (s, 1H), 3.80 (s, 3H), 2.67 (t, *J* = 6.7 Hz, 4H), 1.79 (t, *J* = 6.4 Hz, 4H). <sup>13</sup>C NMR (CDCl<sub>3</sub>, 400 MHz): δ 159.11, 131.89, 131.86, 131.83, 131.77, 129.49, 128.37, 128.34, 128.31, 128.14, 123.34, 113.69, 113.66, 113.63, 87.07, 56.74, 58.60, 55.38, 50.35, 50.32, 23.53

### 1-(3-phenyl-1-(*p*-tolyl) prop-2-yn-1-yl)pyrrolidine<sup>4b</sup>

Solid; Yield: 96%; <sup>1</sup>H NMR (CDCl<sub>3</sub>, 400 MHz): δ 7.51-7.48 (m, 4H), 7.32-7.31 (m, 4H), 7.18 (d, *J* = 8.0 Hz, 2H), 4.87 (s, 1H), 2.73-2.69 (t, *J* = 6.7 Hz, 4H), 2.36 (s, 3H), 1.83-1.79 (t, *J* = 6.3 Hz, 4H). <sup>13</sup>C NMR (CDCl<sub>3</sub>, 400 MHz): δ 137.38, 136.50, 131.89, 129.10, 129.07, 129.04, 128.41, 128.39, 128.36, 128.33, 123.37, 87.00, 86.80, 58.97, 50.42, 50.39, 23.56, 21.25

### 1-(1-(4-bromophenyl)-3-phenylprop-2-yn-1-yl)pyrrolidine<sup>4c</sup>

Solid; Yield: 87%; <sup>1</sup>H NMR (CDCl<sub>3</sub>, 400 MHz): δ 7.52-7.47 (m, 6H), 7.33-7.32 (m, 3H), 4.87 (s, 1H), 2.69-2.57 (t, *J* = 22.3 Hz, 4H), 1.80-1.66 (m, 4H). <sup>13</sup>C NMR (CDCl<sub>3</sub>, 400 MHz): δ 138.69, 131.91, 131.46, 130.08, 128.43, 128.38, 123.04, 121.59, 87.48, 85.98, 58.50, 50.23, 23.65, 23.63

### 1-(1-(3-methoxyphenyl)-3-phenylprop-2-yn-1-yl)pyrrolidine<sup>4d</sup>

Solid; Yield: 82%; <sup>1</sup>H NMR (CDCl<sub>3</sub>, 400 MHz): δ 7.53-7.51 (m, 2H), 7.34-7.28 (m, 4H), 7.25-7.23 (d, *J* = 7.1 Hz, 2H), 6.88 (d, *J* = 1.4 Hz, 1H), 4.88 (s, 1H), 3.84 (s, 3H), 2.76-2.72 (m, 4H), 1.85-1.82 (m, 4H). <sup>13</sup>C NMR (CDCl<sub>3</sub>, 400 MHz): δ 159.76,

141.28, 131.92, 129.34, 128.41, 128.23, 123.35, 120.80, 120.80, 114.02, 113.17, 86.99, 86.85, 59.27, 55.35, 50.52, 50.49, 50.46, 23.66, 23.63

#### **1-(3-phenyl-1-(*m*-tolyl) prop-2-yn-1-yl)pyrrolidine<sup>4e</sup>**

Solid; Yield: 95%; <sup>1</sup>H NMR (CDCl<sub>3</sub>, 400 MHz): δ 7.55-7.53 (m, 2H), 7.47-7.45 (m, 2H), 7.36-7.32 (m, 3H), 7.30-7.27 (m, 1H), 7.16-7.14 (dd, J = 9.3, 4.1 Hz, 1H), 4.88 (s, 1H), 2.76-2.74 (m, 4H), 2.42 (s, 3H), 1.87-1.83 (t, J = 6.5 Hz, 4H) <sup>13</sup>C NMR (CDCl<sub>3</sub>, 400 MHz): δ 139.53, 138.04, 131.93, 128.52, 128.40, 128.29, 128.20, 125.52, 123.43, 87.05, 86.89, 59.37, 50.57, 50.55, 50.52, 23.66, 23.63, 23.60, 21.64

#### **1-(1-(3-chlorophenyl)-3-phenylprop-2-yn-1-yl)pyrrolidine<sup>4f</sup>**

Solid; Yield: 90%; <sup>1</sup>H NMR (CDCl<sub>3</sub>, 400 MHz): δ 7.65 (d, J = 1.8 Hz, 1H), 7.53-7.50 (m, 3H), 7.34-7.31 (m, 3H), 7.30-7.28 (m, 2H), 7.25 (s, 1H), 4.91 (s, 1H), 2.72-2.68 (m, 4H), 1.83-1.80 (m, 4H), <sup>13</sup>C NMR (CDCl<sub>3</sub>, 400 MHz): δ 141.77, 134.28, 131.95, 131.90, 129.63, 128.44, 128.40, 127.87, 126.52, 123.04, 58.60, 50.24, 23.65

#### **1-(1-(3,4-methoxyphenyl)-3-phenylprop-2-yn-1-yl)pyrrolidine<sup>4g</sup>**

Solid; Yield: 72%; <sup>1</sup>H NMR (CDCl<sub>3</sub>, 400 MHz): δ 7.48-7.45 (m, 2H), 7.30-7.28 (m, 4H), 7.17-7.12 (m, 2H), 6.83 (d, J = 8.2 Hz, 1H), 4.80 (s, 1H), 3.89 (s, 3H), 3.86 (s, 3H), 2.69 (t, J = 10.6, 6.8 Hz, 4H), 1.80 (t, J = 5.4 Hz, 4H), <sup>13</sup>C NMR (CDCl<sub>3</sub>, 400 MHz): δ 148.91, 148.58, 131.83, 128.37, 128.21, 120.51, 111.50, 110.70, 87.00, 86.84, 59.09, 56.03, 55.97, 50.52, 23.59

#### **1-(3-phenyl-1-(*o*-tolyl) prop-2-yn-1-yl)pyrrolidine<sup>4h</sup>**

Solid; Yield: 94%; <sup>1</sup>H NMR (CDCl<sub>3</sub>, 400 MHz): δ 7.79-7.77 (m, 1H), 7.57-7.55 (m, 2H), 7.37-7.35 (m, 3H), 7.28-7.24 (m, 3H), 5.09 (s, 1H), 2.79 (t, J = 5.2 Hz, 4H), 2.54 (s, 3H), 1.85-1.82 (t, J = 6.2 Hz, 4H), <sup>13</sup>C NMR (CDCl<sub>3</sub>, 400 MHz): δ 137.96, 136.87, 131.94, 130.67, 128.43, 128.37, 128.15, 127.63, 125.79, 125.77, 87.00, 86.97, 56.37, 50.31, 23.75, 19.28

#### **1-(1-(3-nitrophenyl)-3-phenylprop-2-yn-1-yl)pyrrolidine<sup>4i</sup>**

Solid; Yield: 83%; <sup>1</sup>H NMR (CDCl<sub>3</sub>, 400 MHz): δ 8.83 (t, J = 1.9 Hz, 2H), 8.44 (dd, J = 2.3, 1.1 Hz, 1H), 8.42 (dd, J = 2.3, 1.1 Hz, 1H), 8.36-8.35 (m, 1H), 8.34-8.33 (m, 1H), 7.91-7.87 (m, 2H), <sup>13</sup>C NMR (CDCl<sub>3</sub>, 400 MHz): δ 146.89, 139.58, 134.39, 131.87, 130.03, 129.21, 128.85, 128.82, 128.35, 127.17, 123.37, 120.71, 59.20, 50.36, 23.55.

#### **1-(1-(4-chlorophenyl)-3-phenylprop-2-yn-1-yl)pyrrolidine<sup>4j</sup>**

Solid; Yield: 86%; <sup>1</sup>H NMR (CDCl<sub>3</sub>, 400 MHz): δ 7.52-7.47 (m, 6H), 7.33-7.32 (m, 3H), 4.87 (s, 1H), 2.68 (m, 4H), 1.80 (m, 4H), <sup>13</sup>C NMR (CDCl<sub>3</sub>, 400 MHz): δ 131.88, 129.68, 129.09, 128.82, 128.77, 128.38, 128.36, 127.68, 127.5, 127.51, 86.99, 59.22, 50.37, 23.55.

## **5. $^1\text{H}$ and $^{13}\text{C}$ NMR spectra of synthesised compounds**

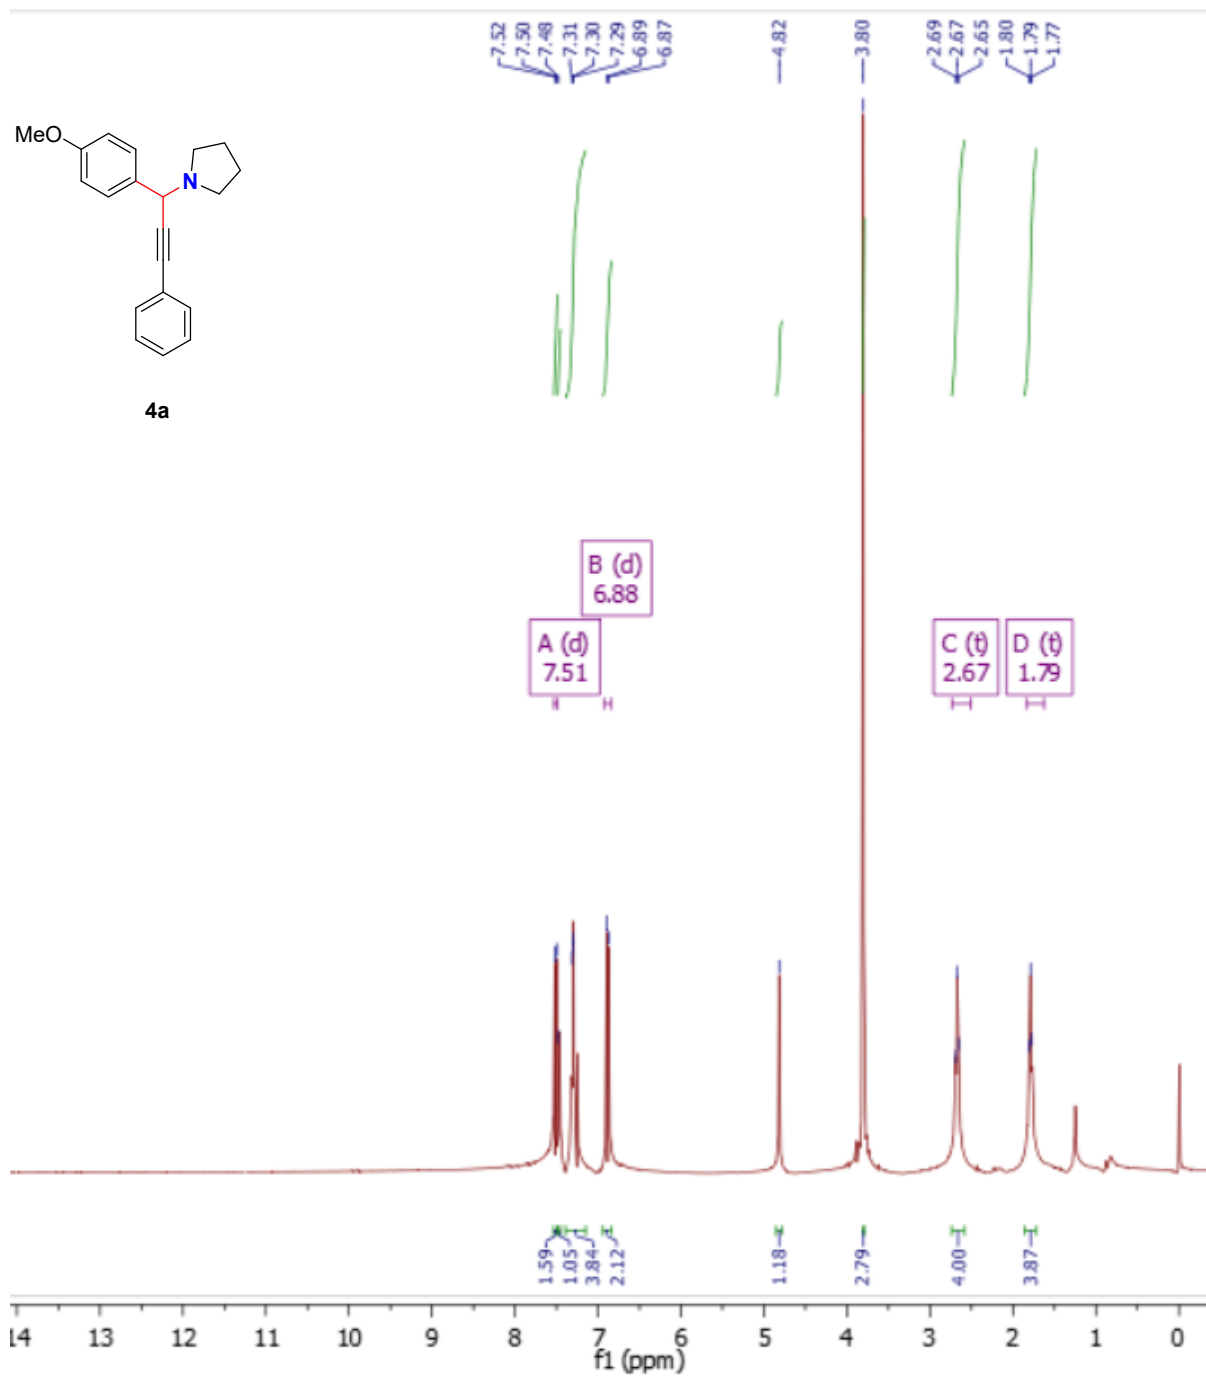

**Figure S6:**  $^1\text{H}$  NMR of 1-(1-(4-methoxyphenyl)-3-phenylprop-2-yn-1-yl)pyrrolidine



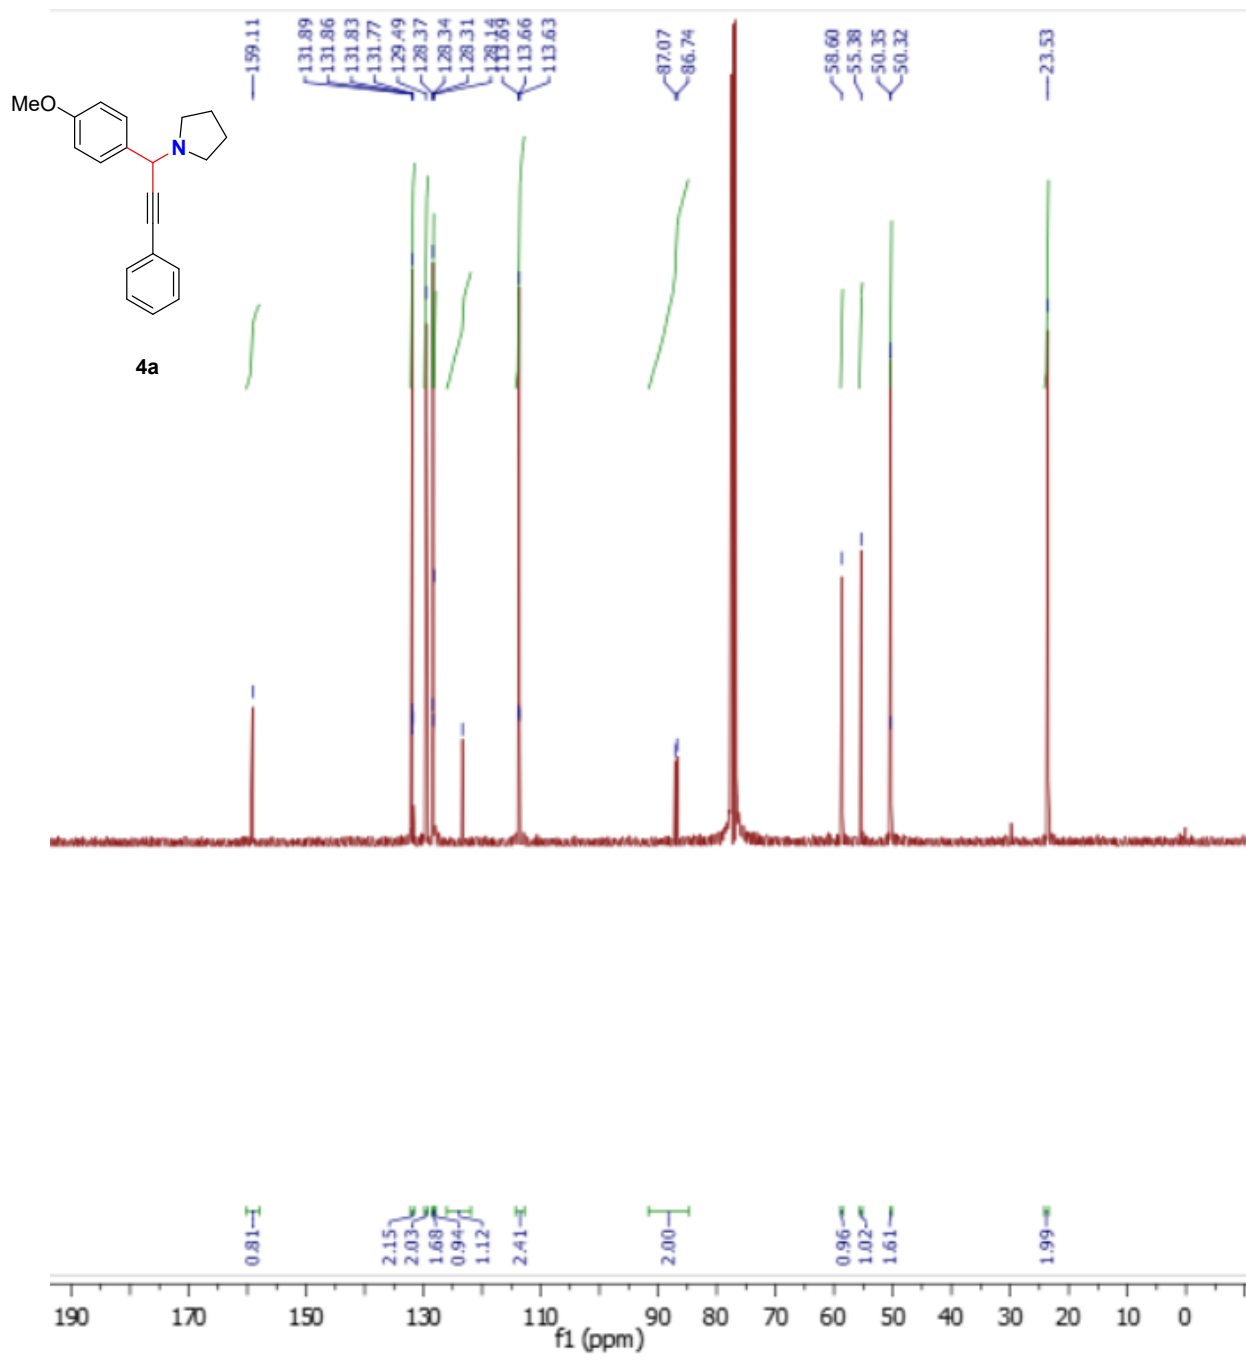

**Figure S7:**  $^{13}\text{C}$  NMR of 1-(1-(4-methoxyphenyl)-3-phenylprop-2-yn-1-yl)pyrrolidine

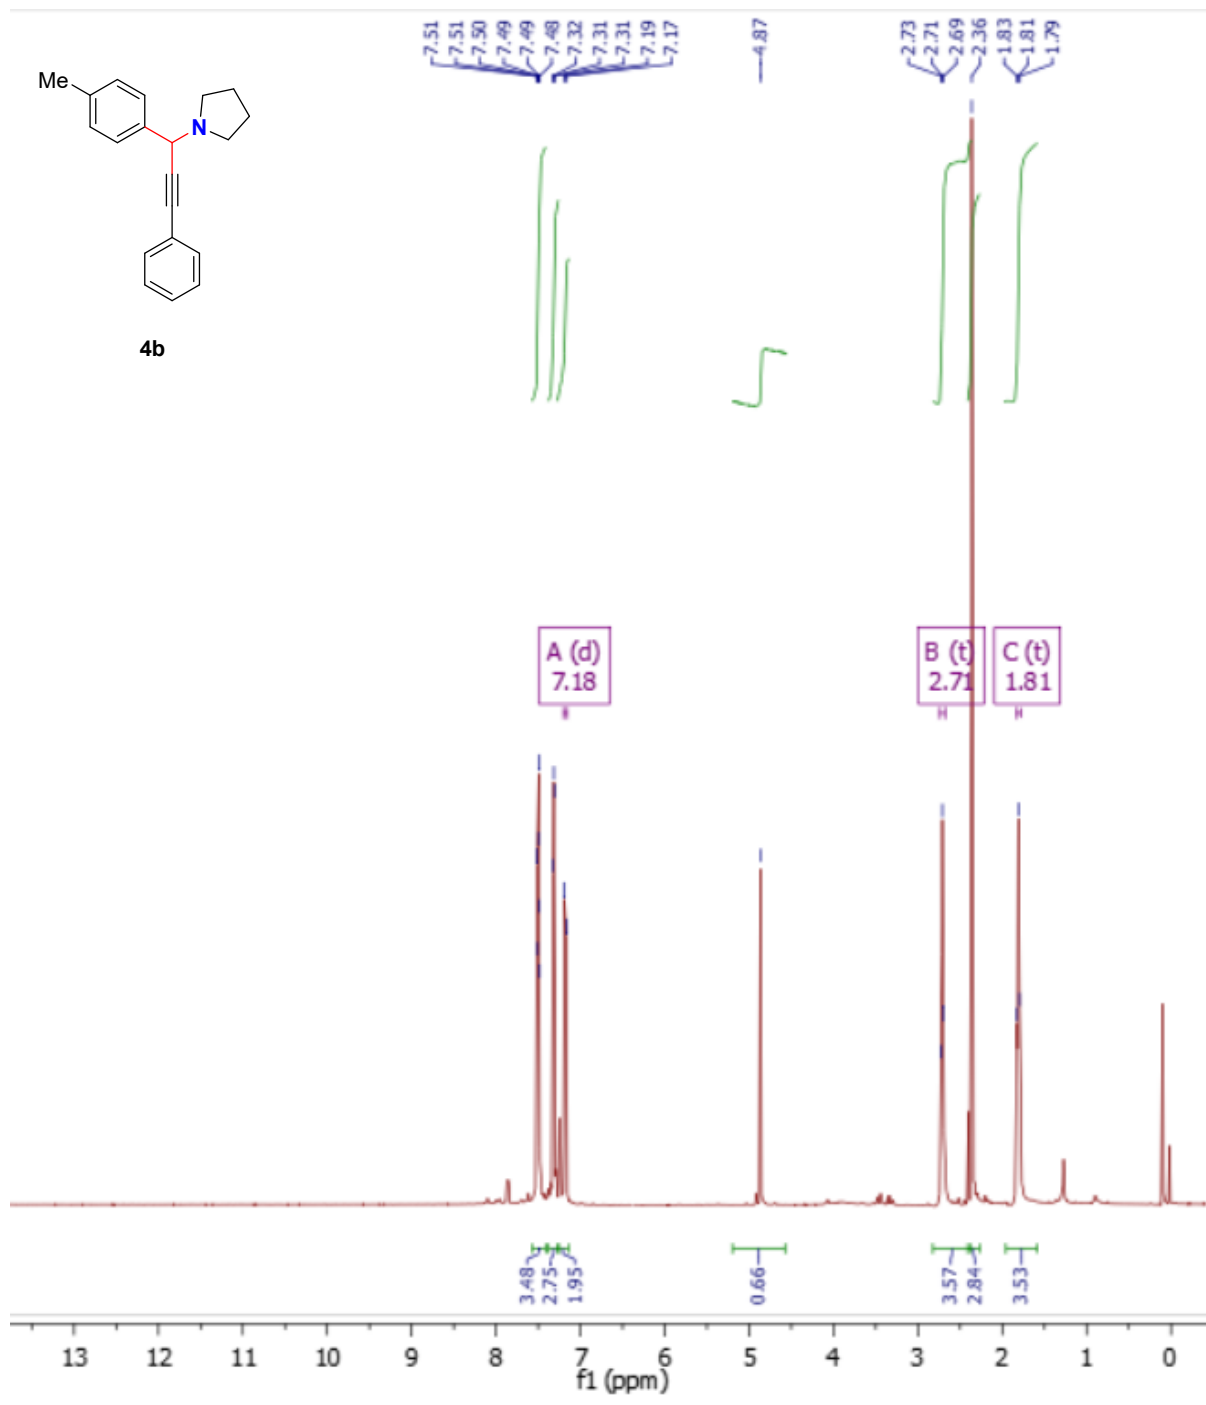

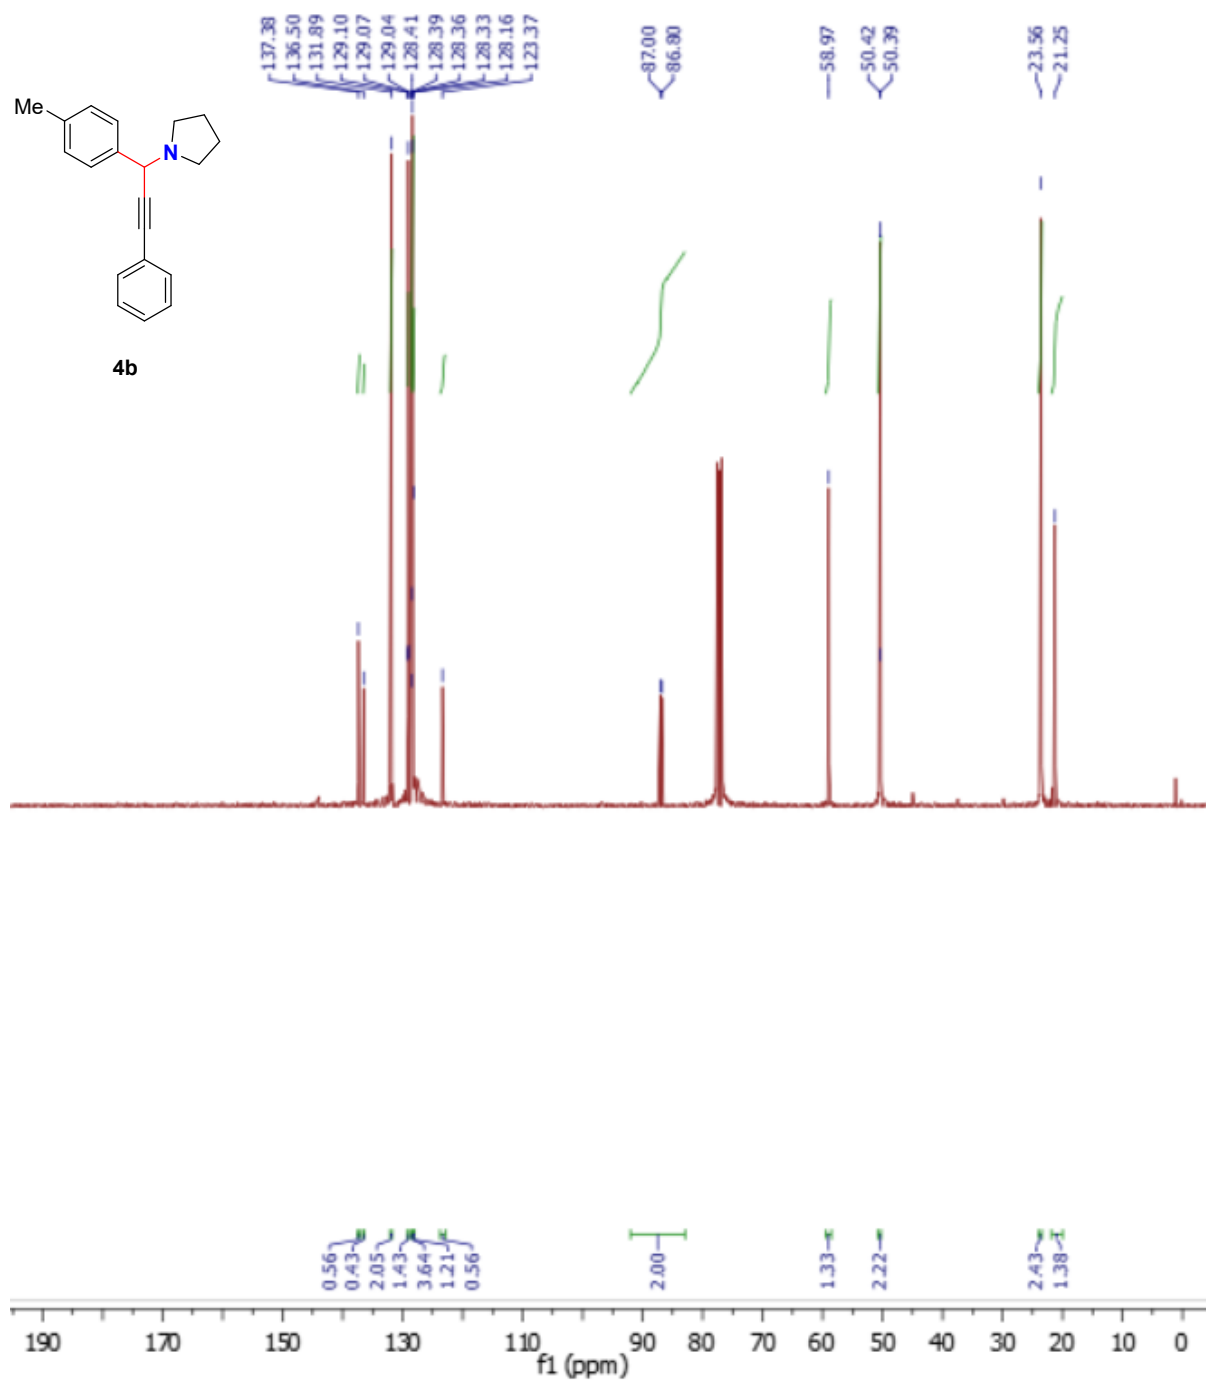

**Figure S9:**  $^{13}\text{C}$  NMR of 1-(3-phenyl-1-(*p*-tolyl)prop-2-yn-1-yl)pyrrolidine

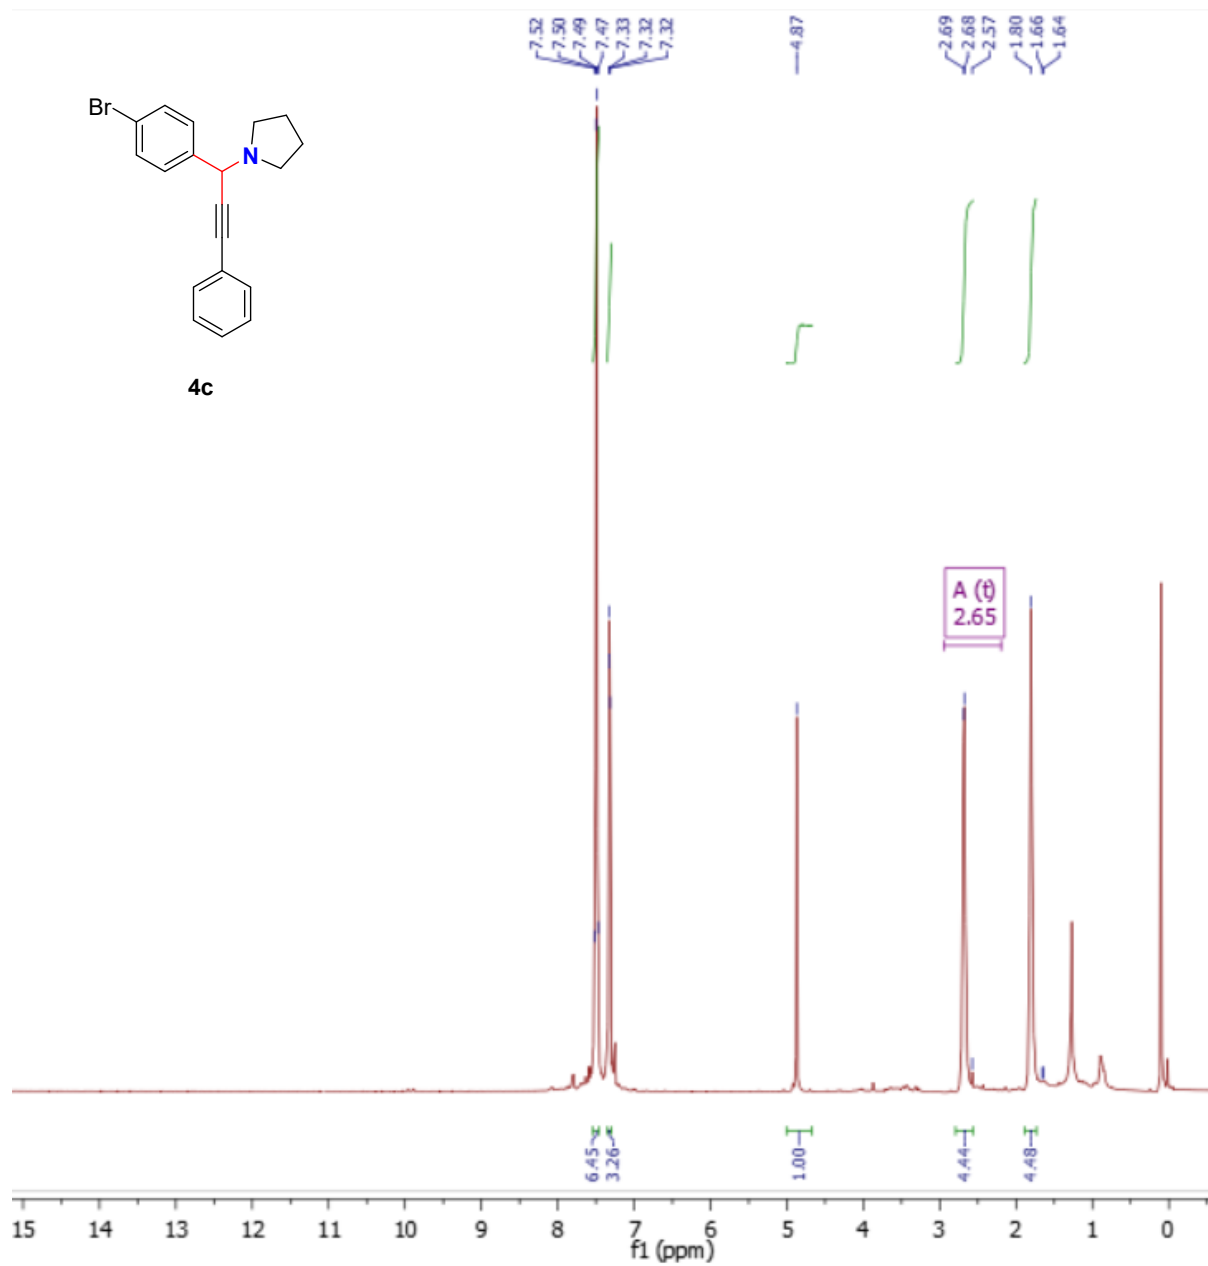

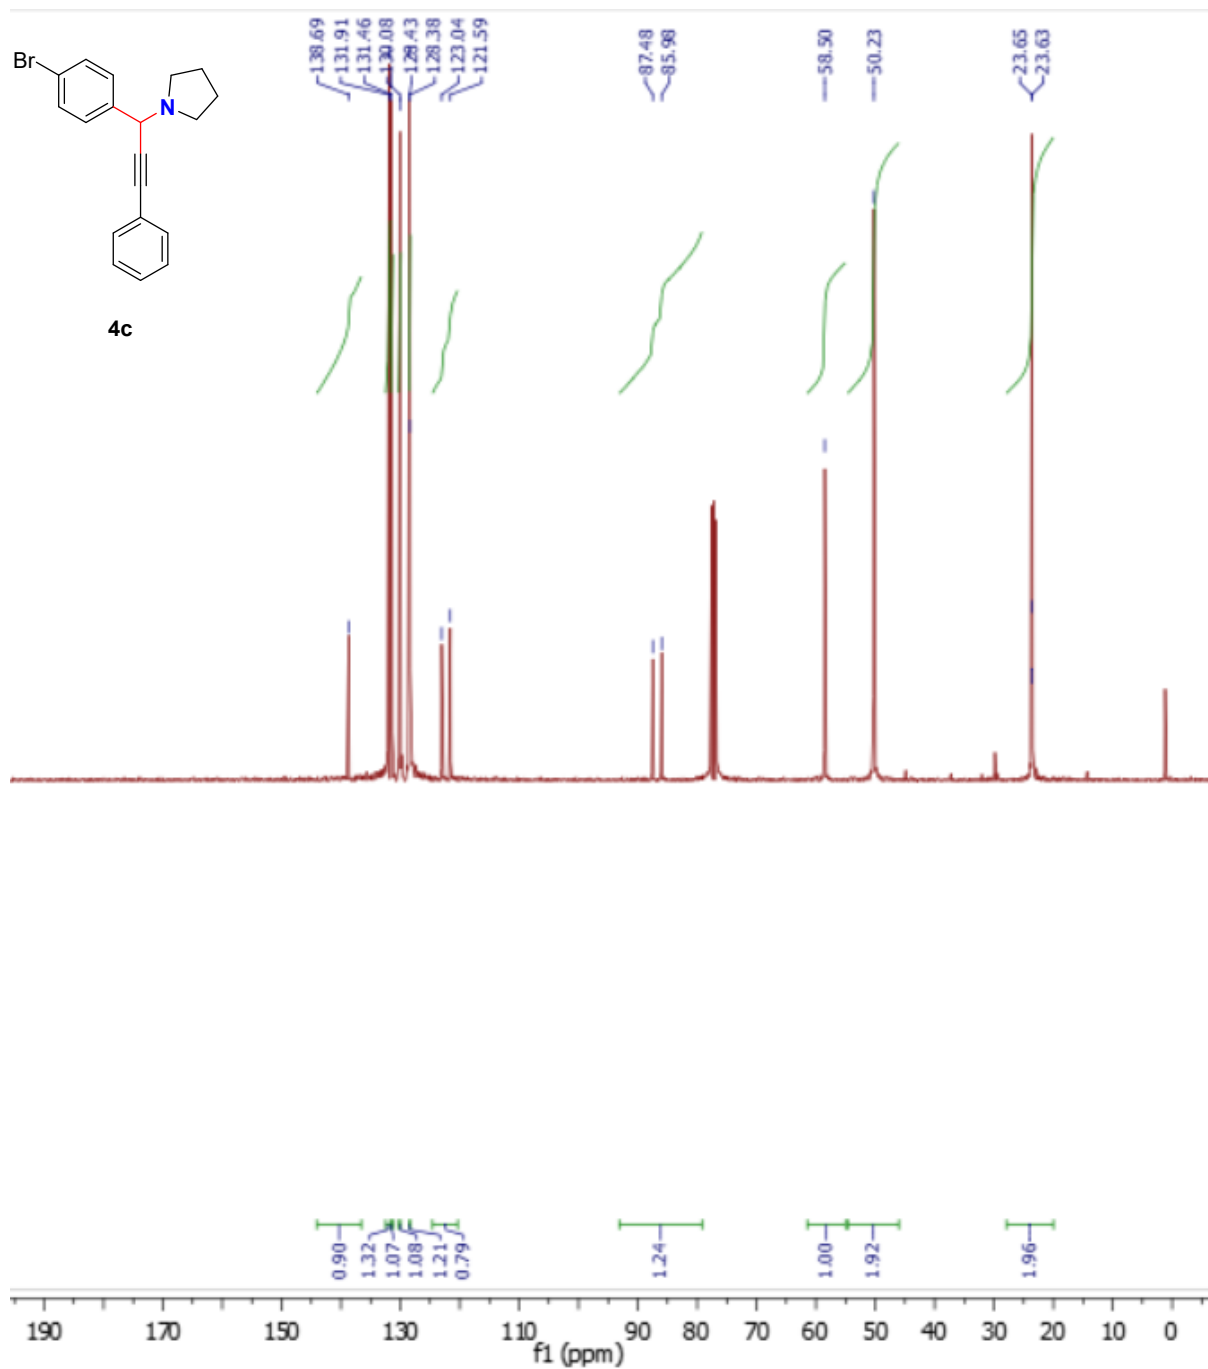

**Figure S11:** <sup>13</sup>C NMR of 1-(1-(4-bromophenyl)-3-phenylprop-2-yn-1-yl)pyrrolidine

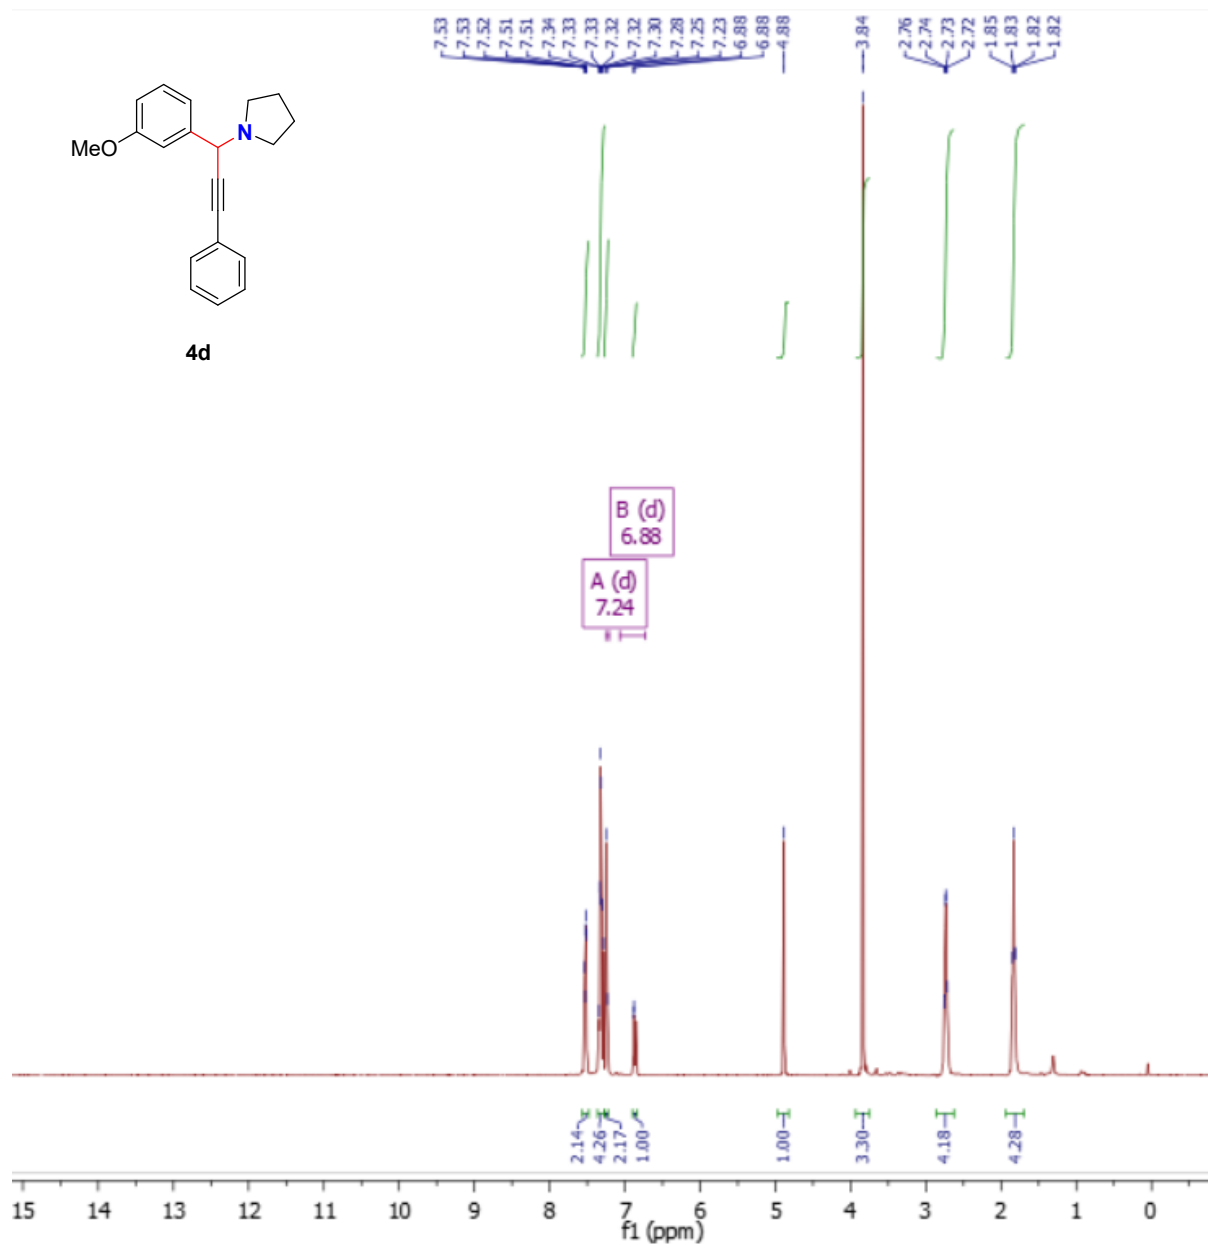

**Figure S12:**  $^1\text{H}$  NMR of 1-(1-(3-methoxyphenyl)-3-phenylprop-2-yn-1-yl)pyrrolidine

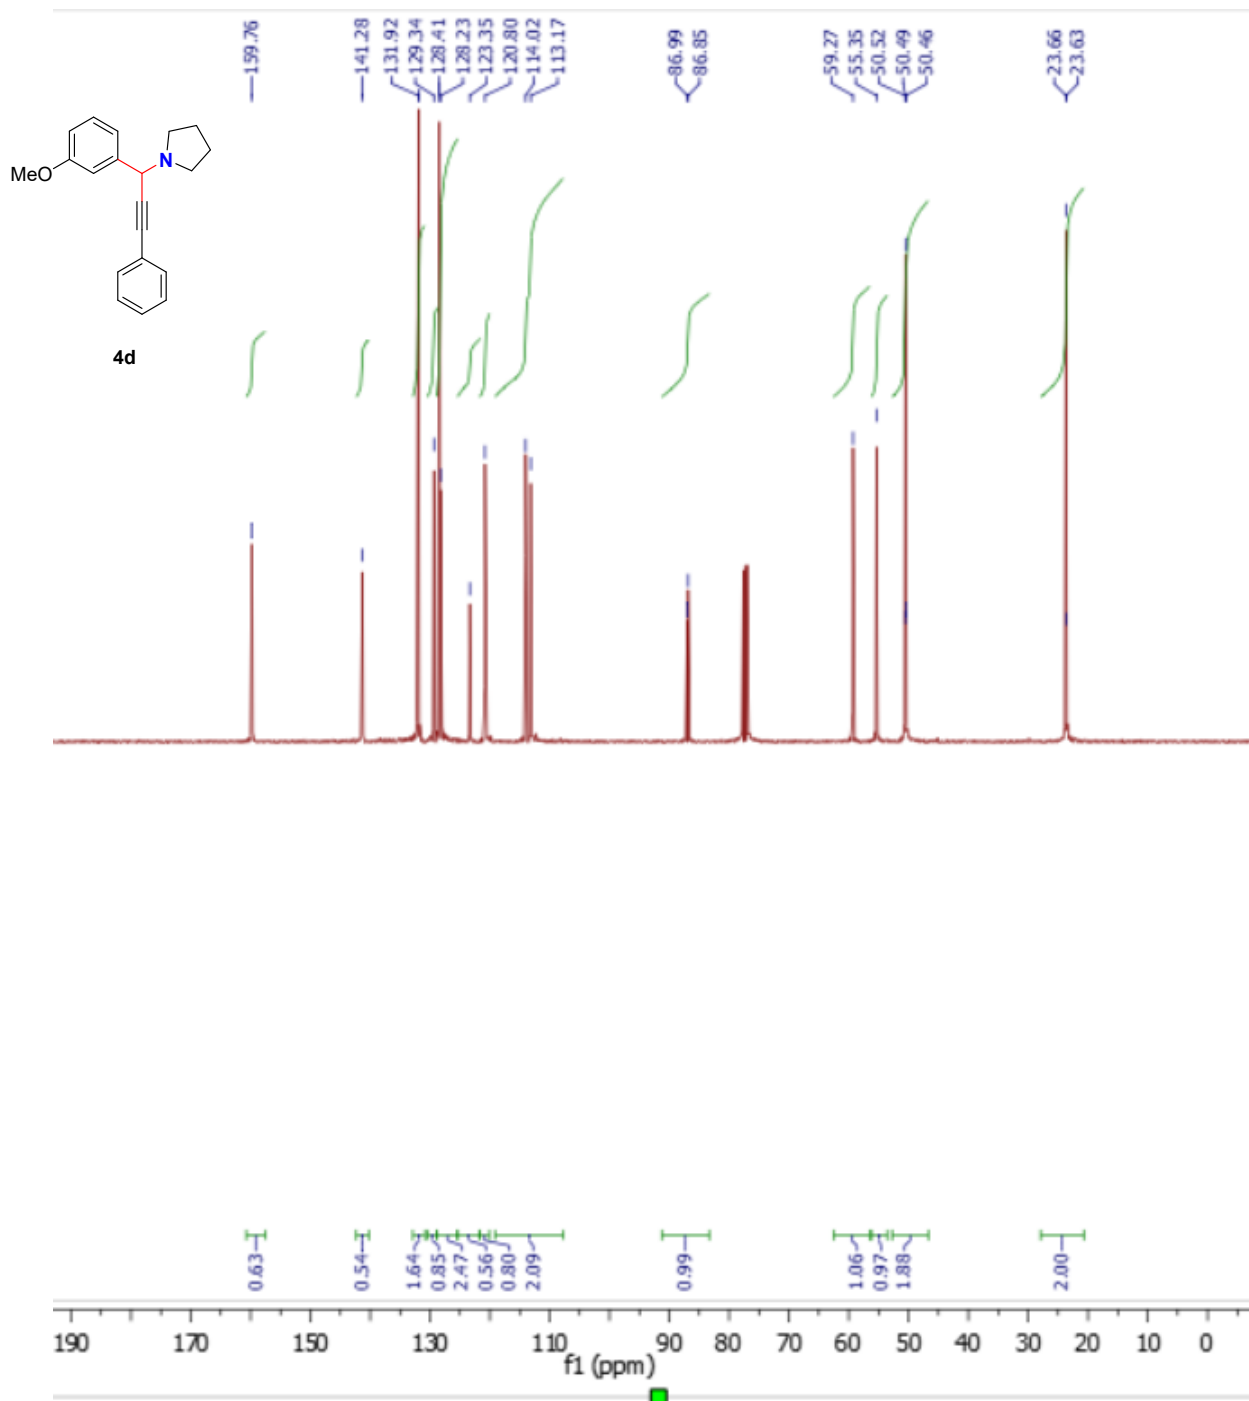

Figure S13: <sup>13</sup>C NMR of 1-(1-(3-methoxyphenyl)-3-phenylprop-2-yn-1-yl)pyrrolidine

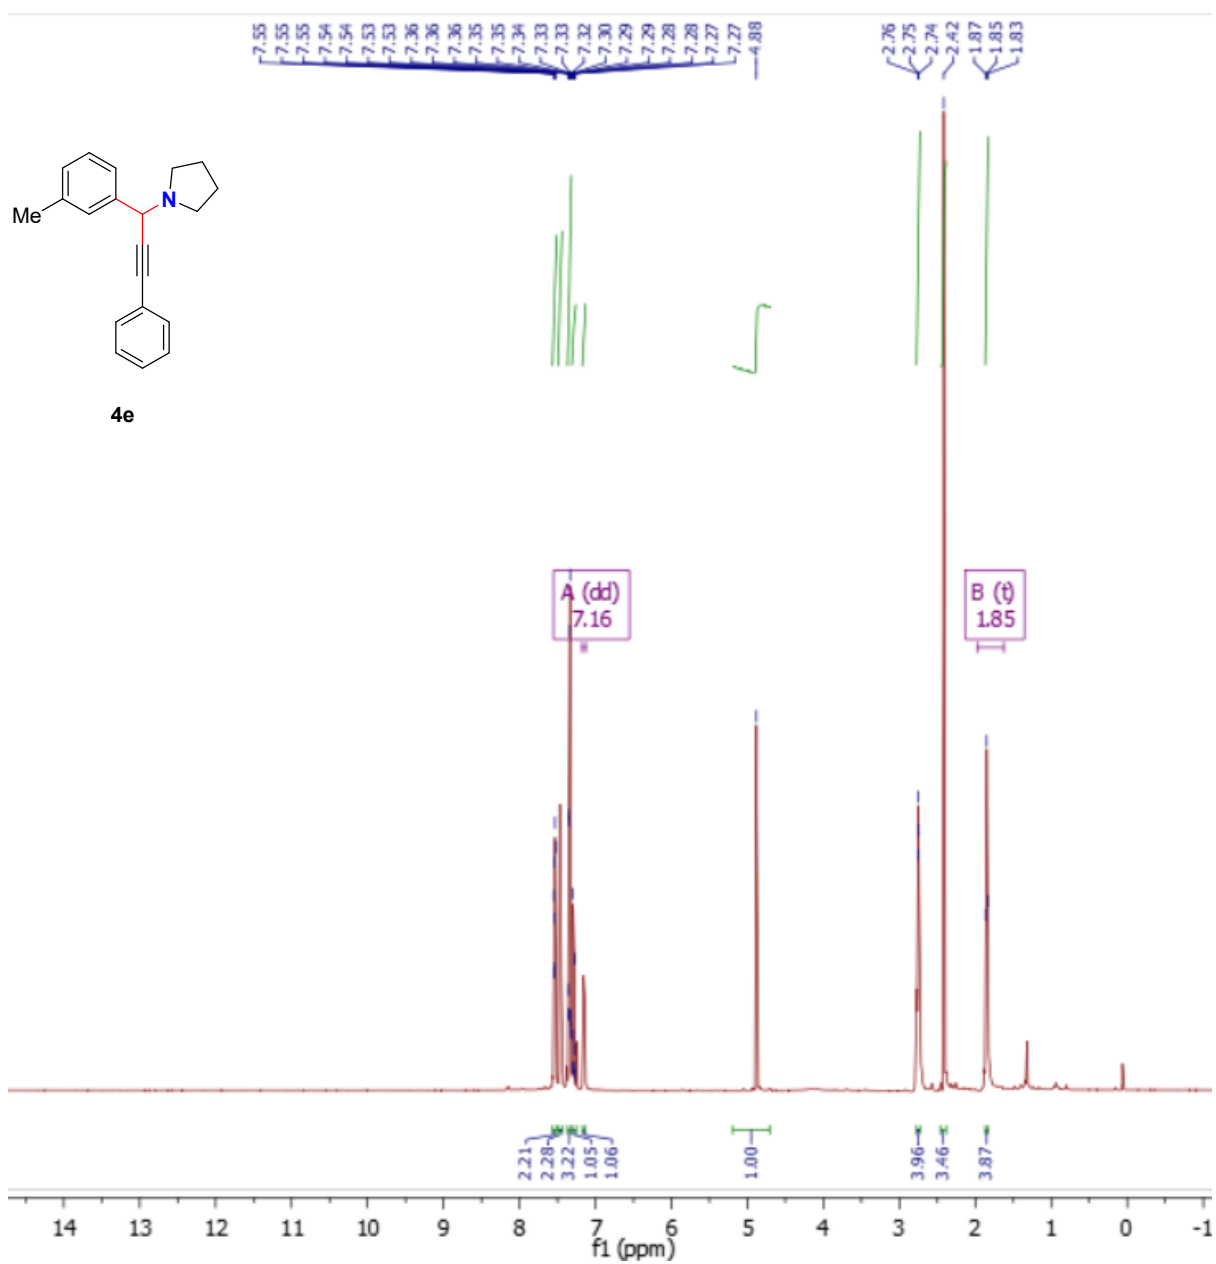



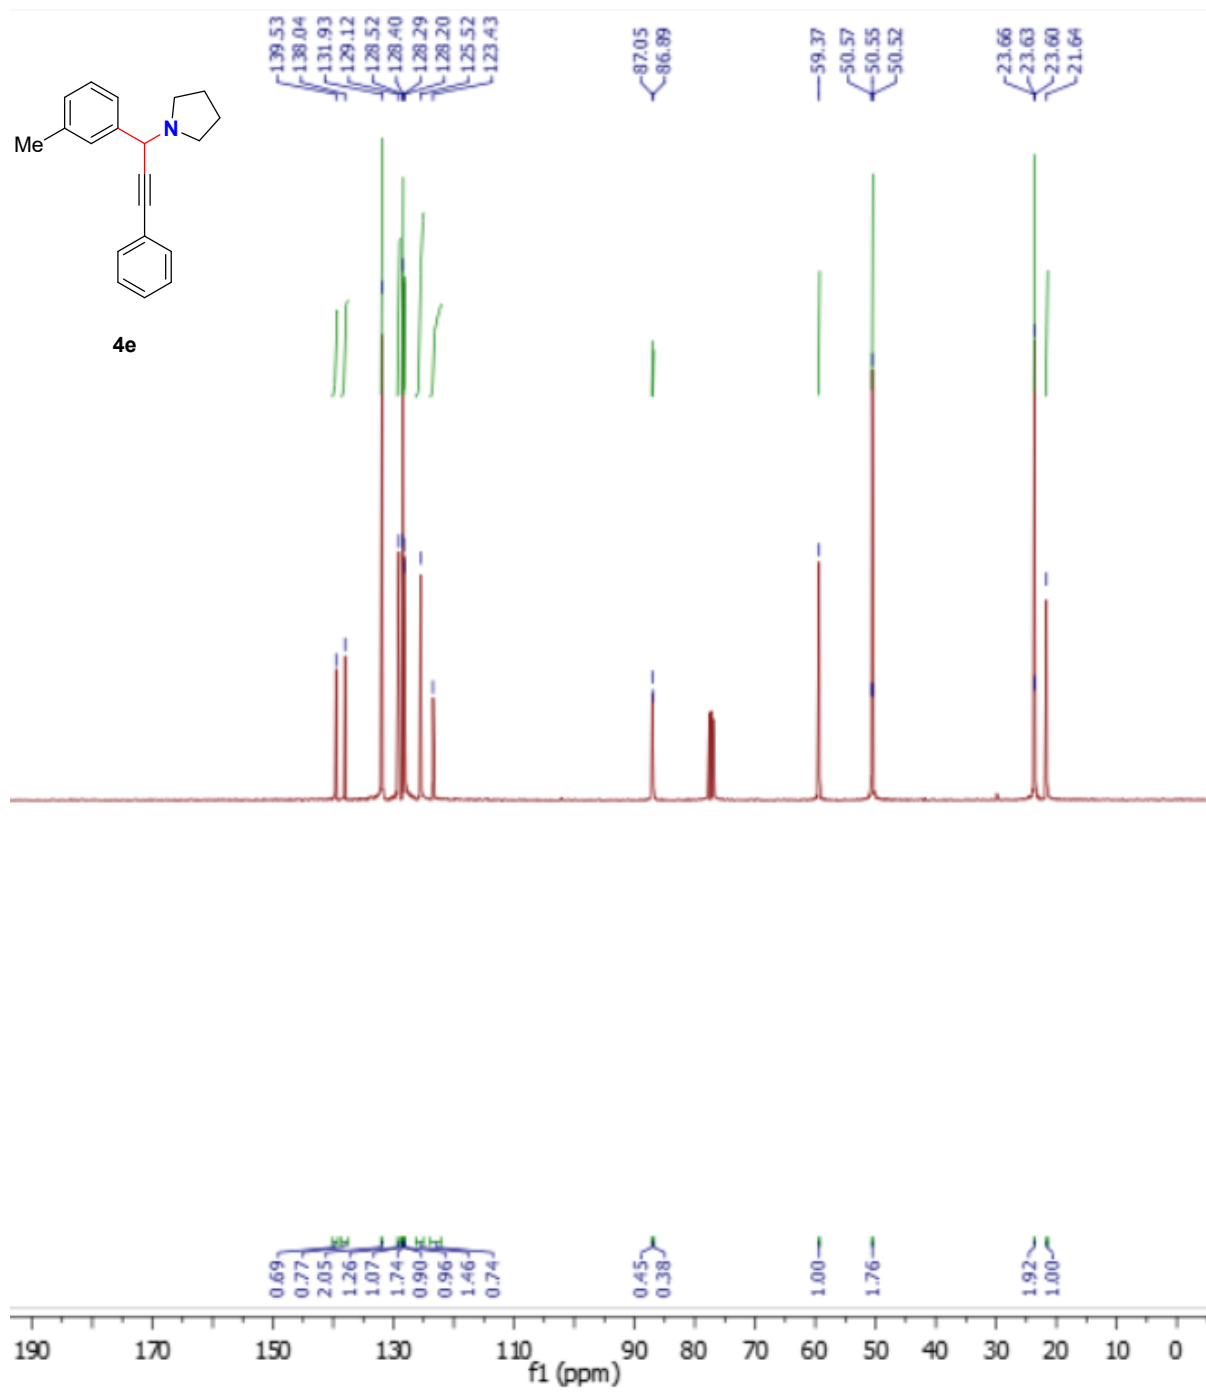

Figure S15: <sup>13</sup>C NMR of 1-(3-phenyl-1-(*m*-tolyl) prop-2-yn-1-yl)pyrrolidine

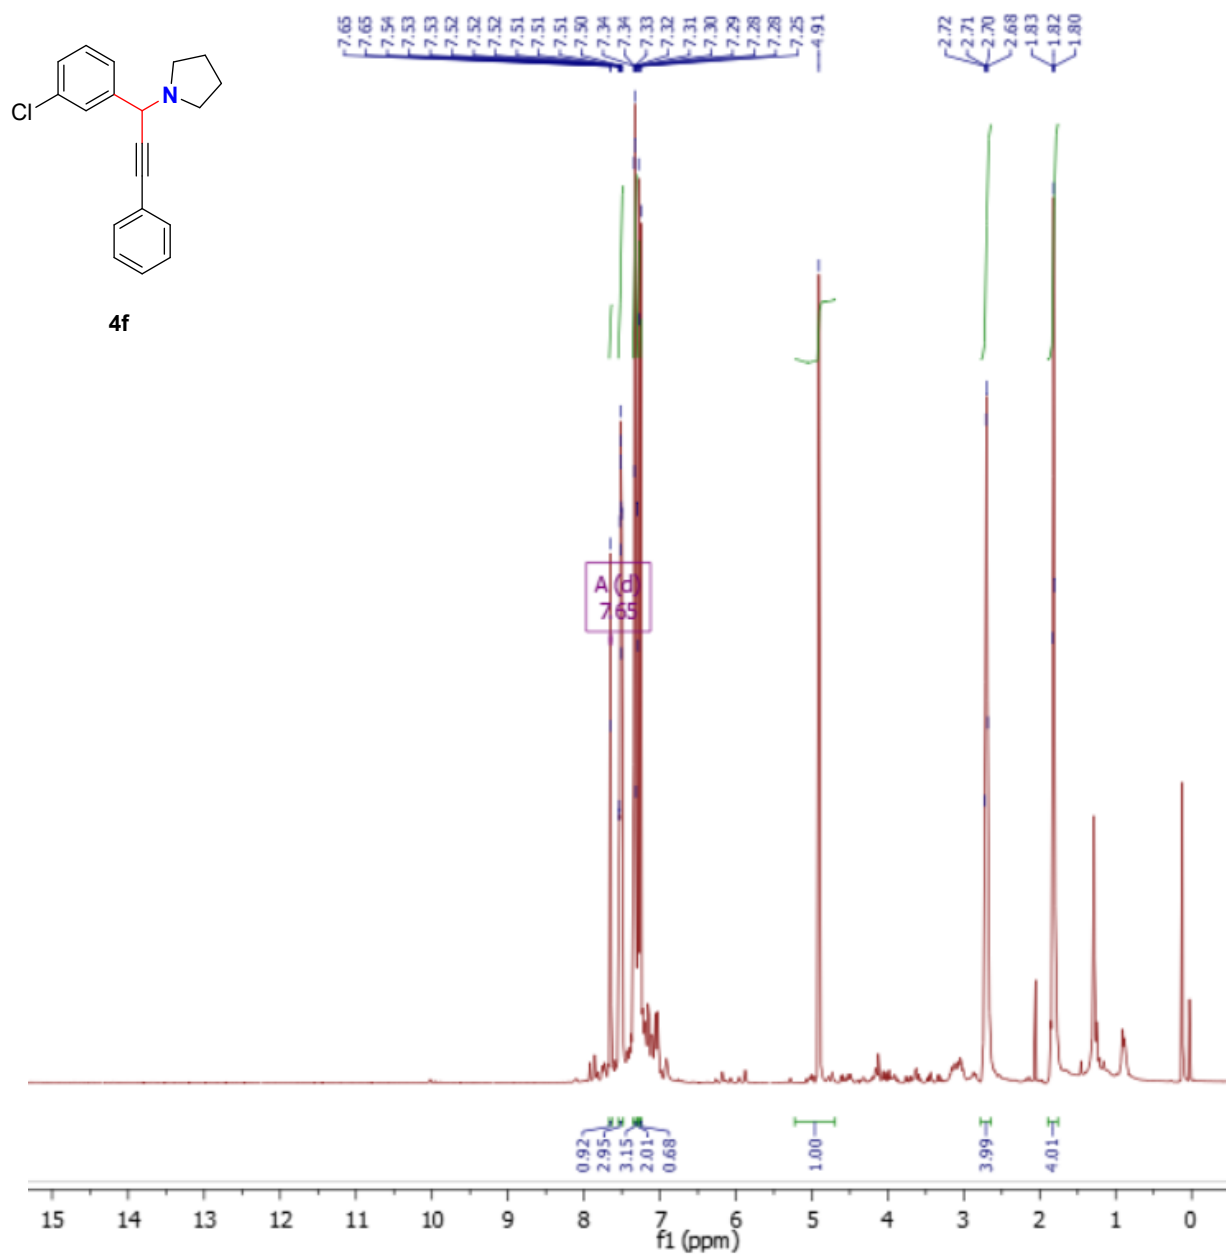

**Figure S16:** <sup>1</sup>H NMR of 1-(1-(3-chlorophenyl)-3-phenylprop-2-yn-1-yl)pyrrolidine

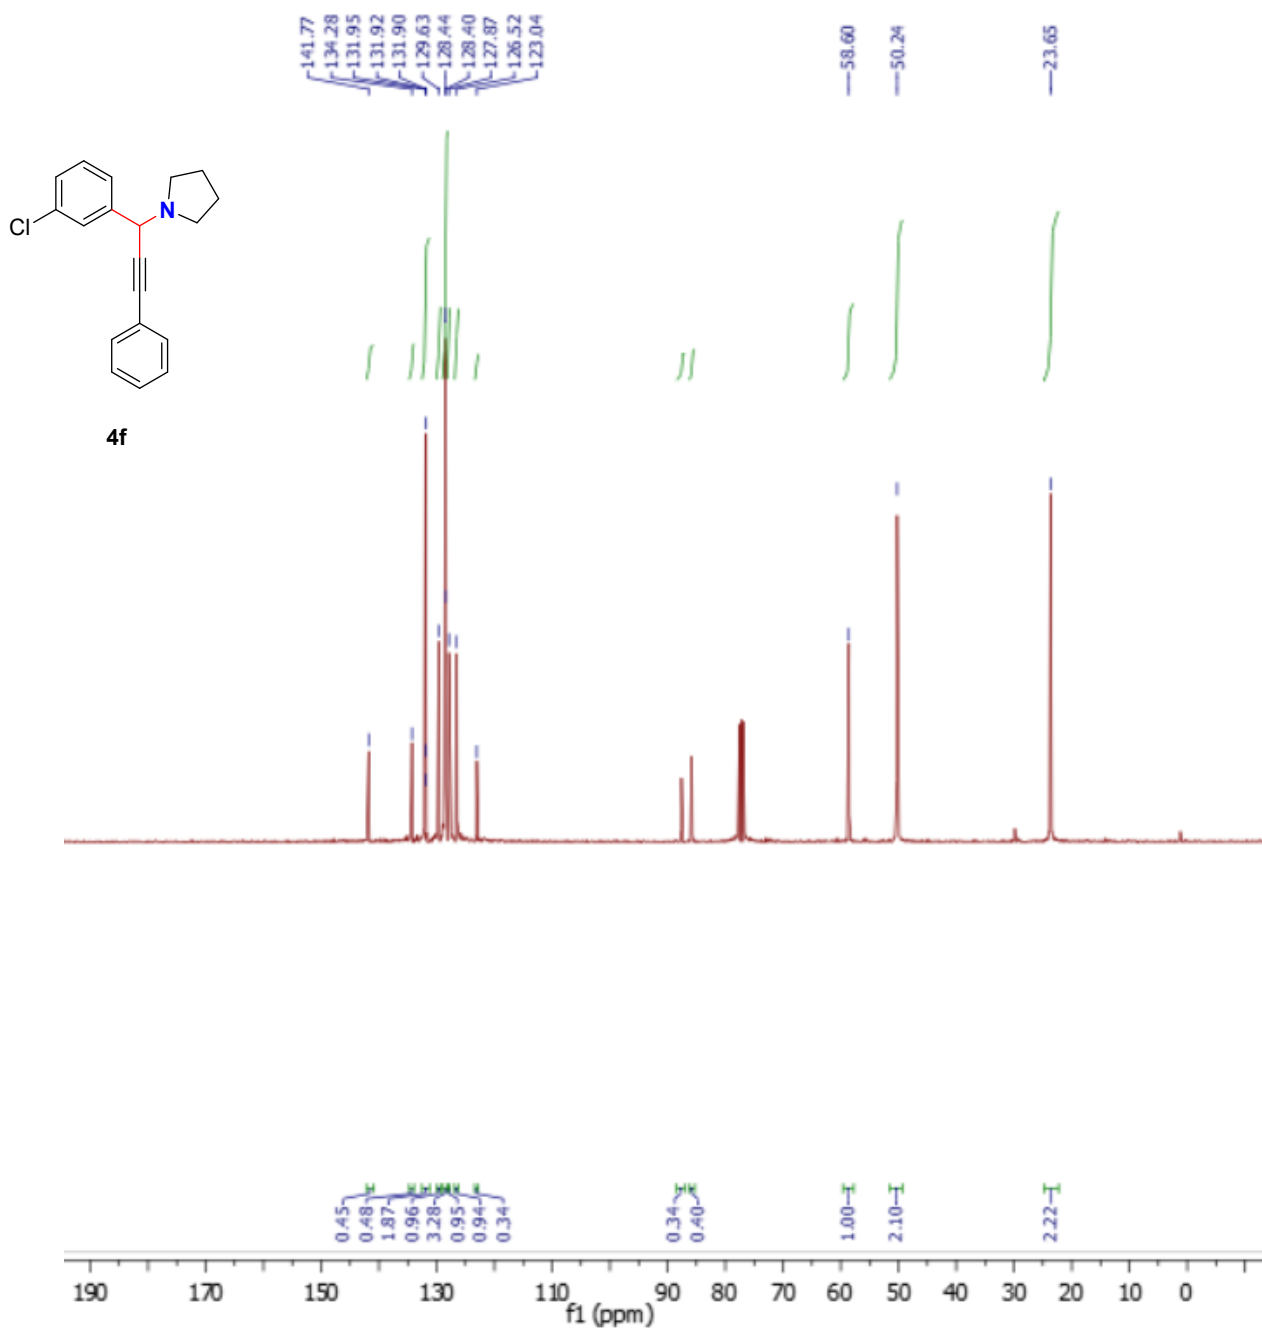

Figure S17: <sup>13</sup>C NMR of 1-(1-(3-chlorophenyl)-3-phenylprop-2-yn-1-yl)pyrrolidine

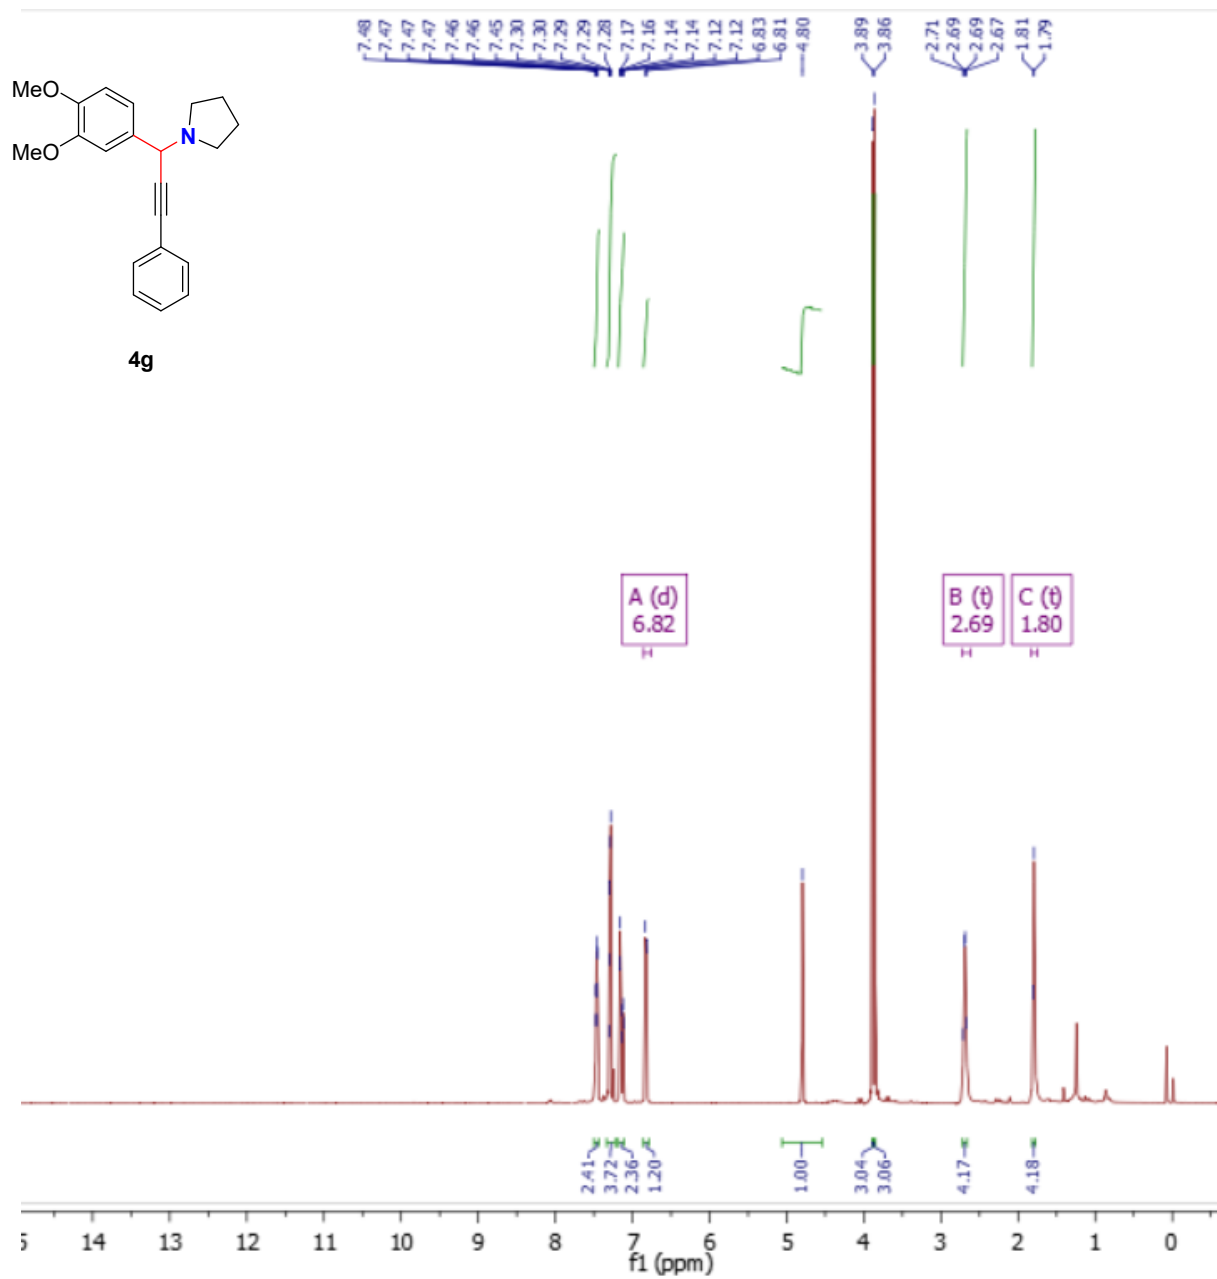

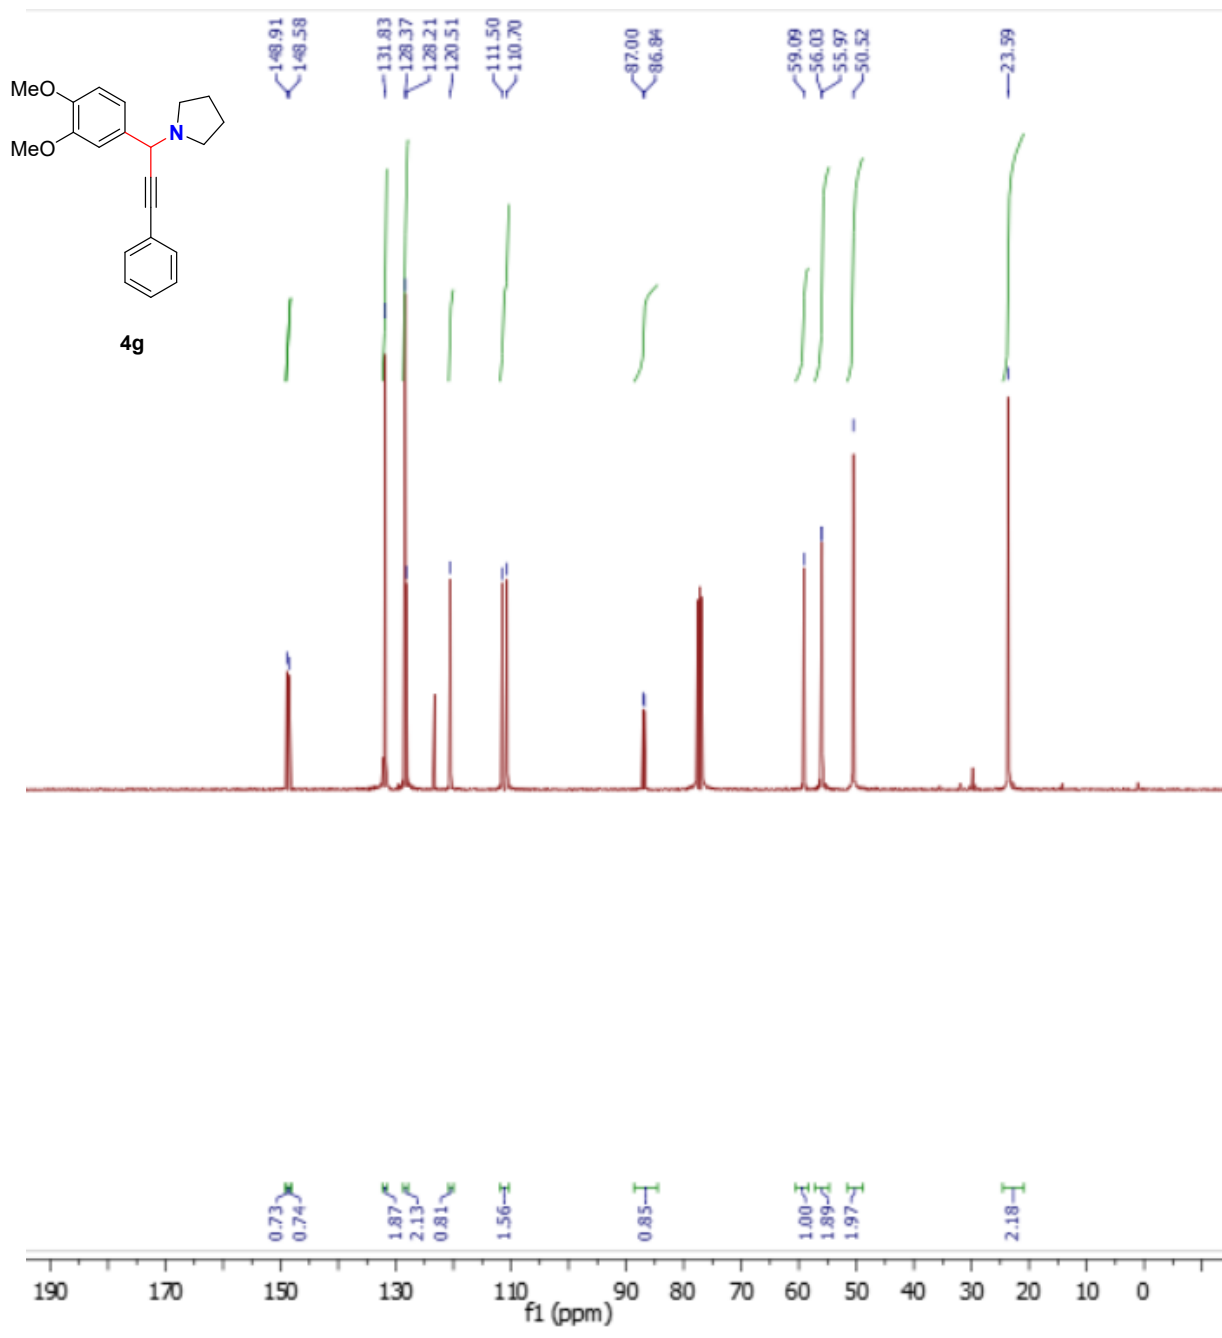

**Figure S19:** <sup>13</sup>C NMR of 1-(1-(3,4-methoxyphenyl)-3-phenylprop-2-yn-1-yl)pyrrolidine

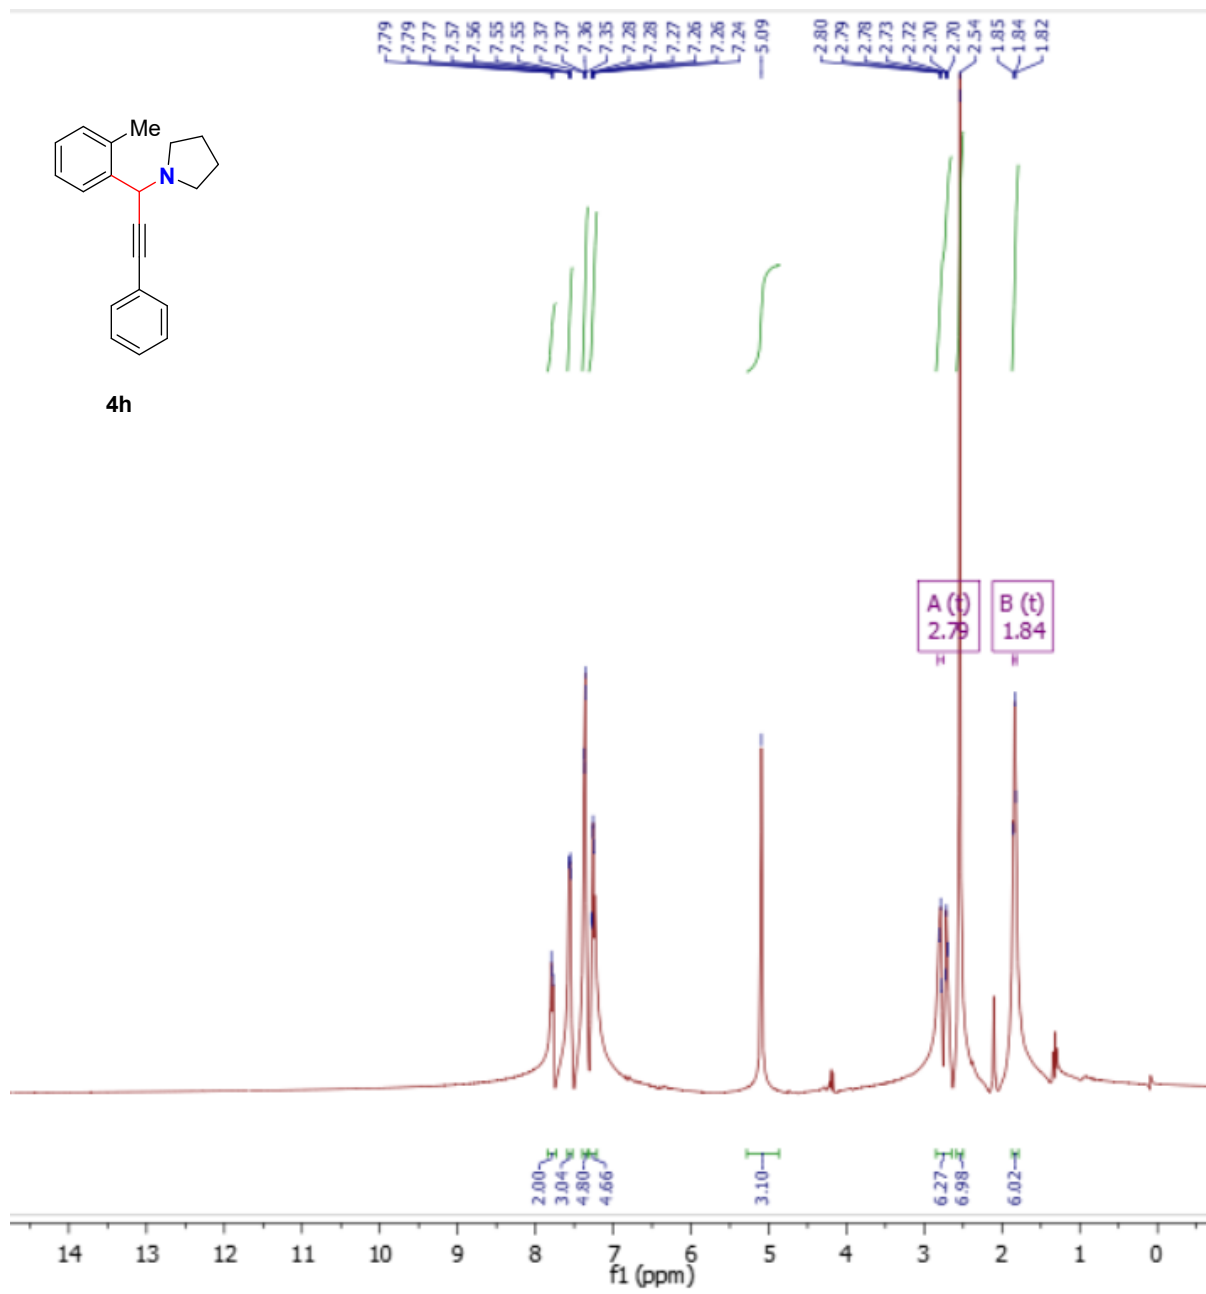

**Figure S20:**  $^1\text{H}$  NMR of 1-(3-phenyl-1-(*o*-tolyl) prop-2-yn-1-yl)pyrrolidine

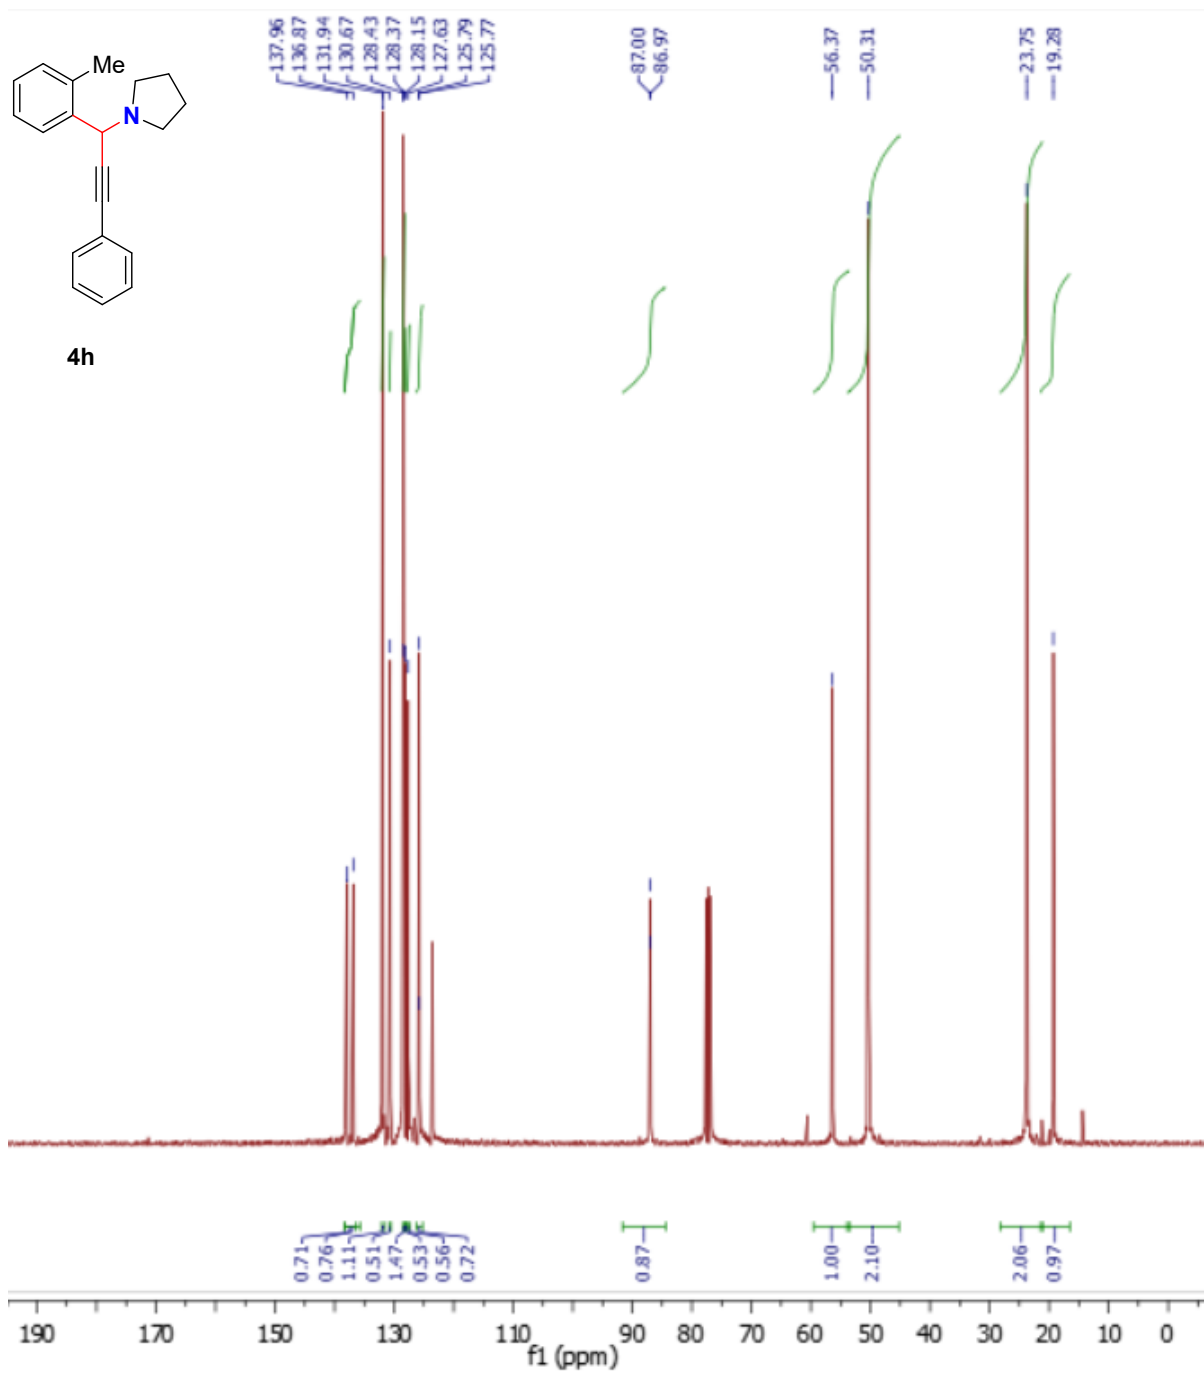

**Figure S21:**  $^{13}\text{C}$  NMR of 1-(3-phenyl-1-(*o*-tolyl) prop-2-yn-1-yl)pyrrolidine

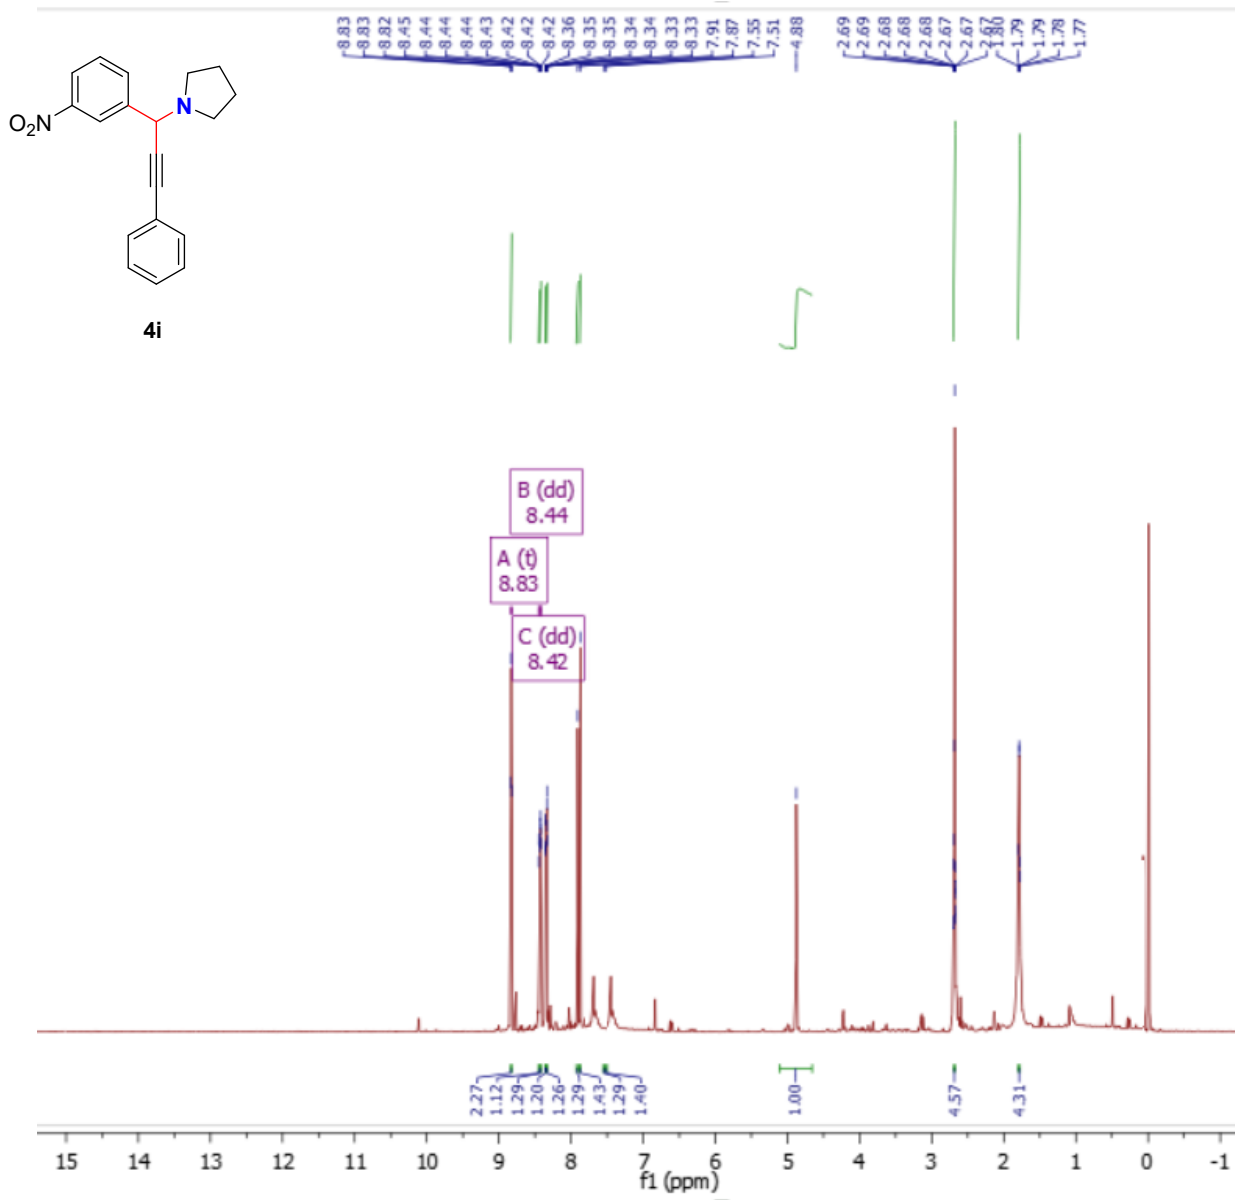

**Figure S22:**  $^1\text{H}$  NMR of 1-(1-(3-nitrophenyl)-3-phenylprop-2-yn-1-yl)pyrrolidine



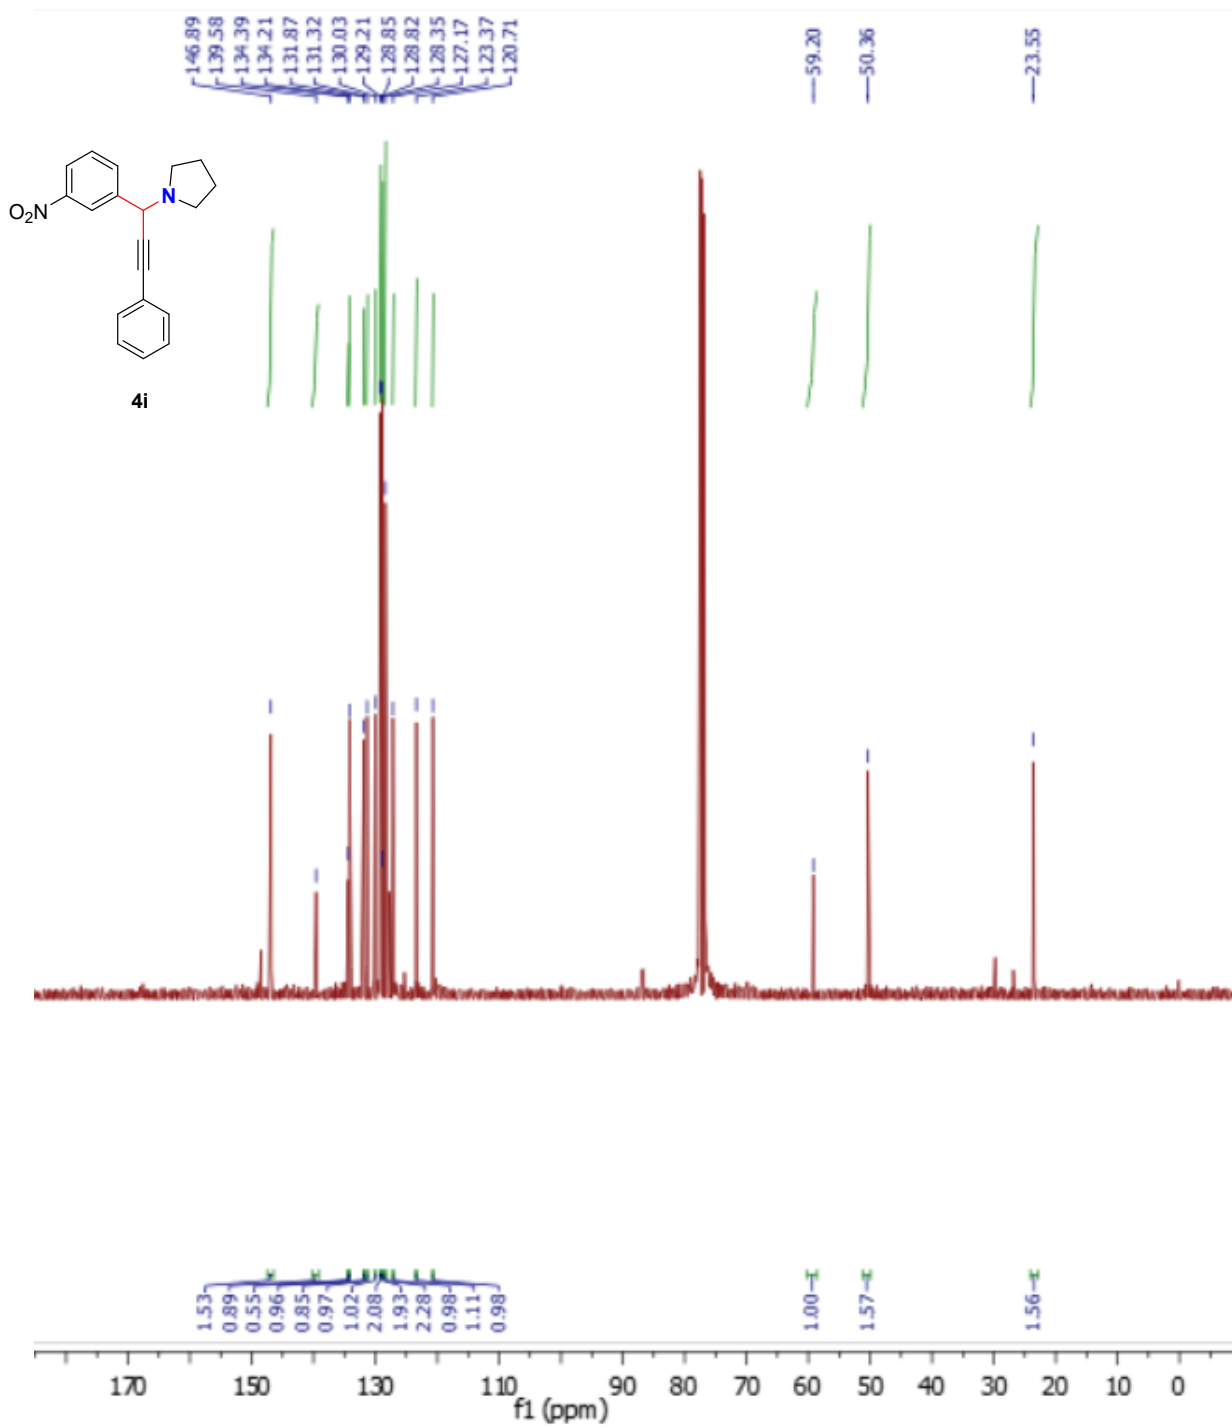

**Figure S23:** <sup>13</sup>C NMR of 1-(1-(3-nitrophenyl)-3-phenylprop-2-yn-1-yl)pyrrolidine

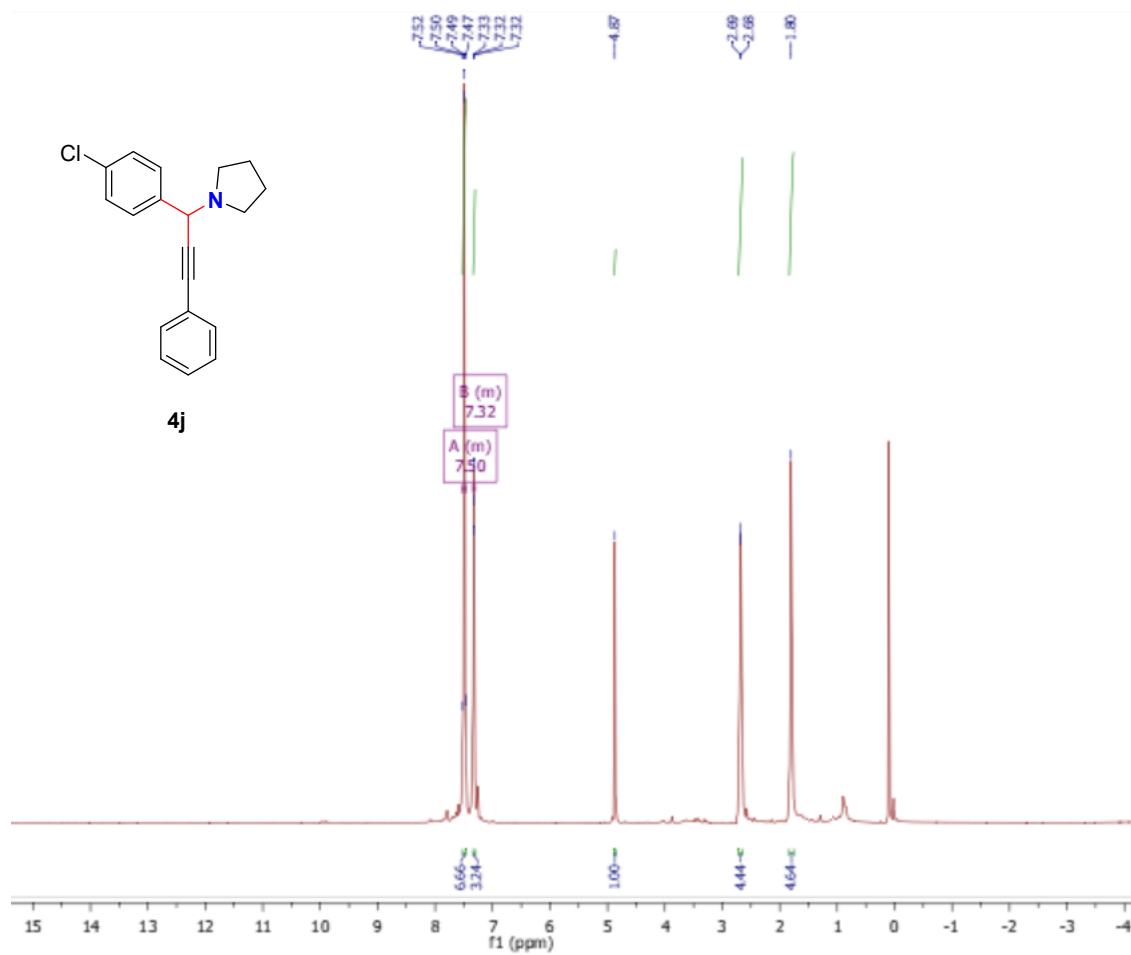

**Figure S24:** <sup>1</sup>H NMR of 1-(1-(4-chlorophenyl)-3-phenylprop-2-yn-1-yl)pyrrolidine

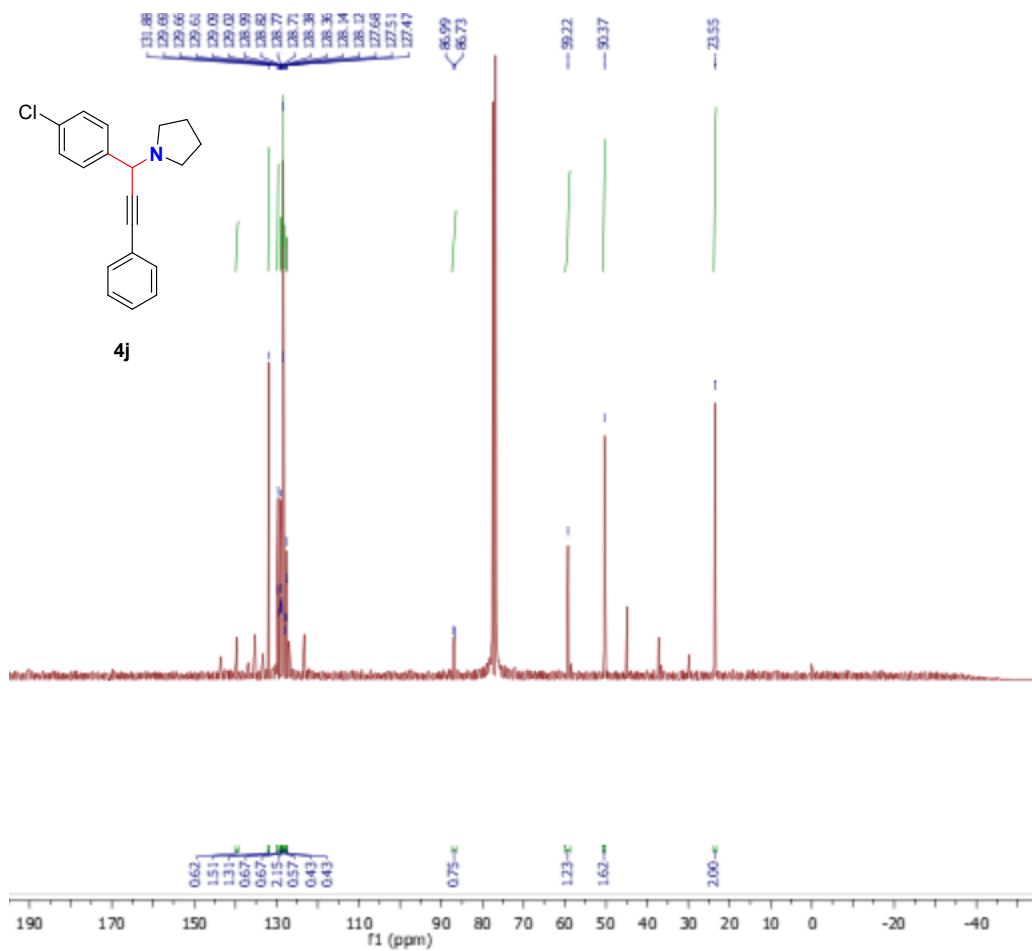

**Figure S25:**  $^{13}\text{C}$  NMR of 1-(1-(4-chlorophenyl)-3-phenylprop-2-yn-1-yl)pyrrolidine
